# Supplementary material for: Genome-wide identification and expression analysis of carotenoid cleavage oxygenase genes in Litchi (Litchi chinensis Sonn.)
Source: PubMed Central journal article supplement (PMC9361530; doi:10.1186/s12870-022-03772-w), 2022-08-09
Supplement: 12870_2022_3772_MOESM1_ESM.pdf [file 12870_2022_3772_MOESM1_ESM.pdf]

Supplement Figure 1. The dynamic of carotenoid content during fruit maturation of litchi.

A: 'Feizixiao' variety; B: 'Nuomici' variety. Different letters indicated statistically differences between days of after anthesis using one-way ANOVA with the SAS test ( $P < 0.05$ ).

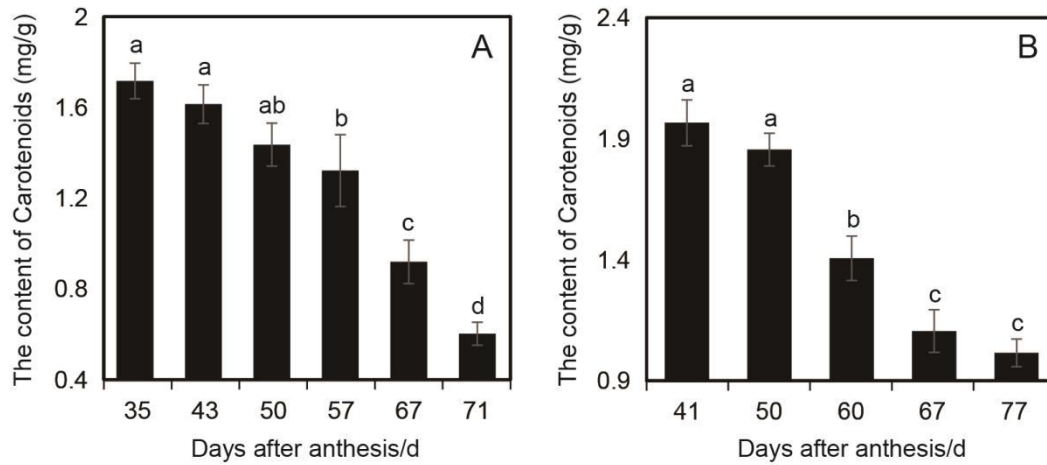

Supplement Table S1. Primers of selected *LcCCO* genes in litchi and reference genes.

| Gene name          | Primer_F(5' to 3')     | Primer_R(5' to 3')        |
|--------------------|------------------------|---------------------------|
| <i>LcEF-1α</i>     | CGTGGATTCGTGCGCATCTAAC | CCGCCTGTCAATCTTGGTCAAT    |
| <i>LcGAPDH</i>     | GATACAGTTCCCGTGTGTGAC  | CATAAAGACACATAACACCACACTC |
| <i>LcCCD1</i>      | CGTCCAGTTTCTCCACCCA    | ATCCTCTCCGTGGTTCTGGA      |
| <i>LcCCDlike-b</i> | TGGGGATGCGTGTAAACAAA   | GGCCTCAAGAACAACCTG        |
| <i>LcCCD4</i>      | TGTGTATGCAGCAGTGGGAG   | ACCCATCATCCTCCTCAGCT      |
| <i>LcCCD4a2</i>    | ACCACTCCGTCTCTCCAGAT   | CCGGTGAAAACATGGCTTGG      |
| <i>LcCCD4b</i>     | TCCATCCGTTGATCCAAGCC   | TGAAGAGAGTTGCGAGCTGG      |
| <i>LcCCD8a</i>     | AGTTTGAGTGGTGCCCGAAA   | GGCCGTCAATCTCCCTTCAT      |
| <i>LcCCD8b</i>     | GTTCTCCGAGGTCCCAAAAG   | CCTATCGTCTCCAGCGTGTC      |
| <i>LcNCED1</i>     | TGAACCGAAACATGCTGGGA   | AAAACAAAGGCTCCCCACCA      |
| <i>LcNCED2</i>     | TGGTCACCACTTCTTCGACG   | CAAGAGCCGACCAATCCCAT      |
| <i>LcNCED3</i>     | CGGGTAACTTCGCTCCTGTT   | GCCATTGACAGGTTGGGA        |

**Supplement Table S2. *Cis*-acting element information in the promoter region of *LcCCO* genes in Litchi.**

| <b>Gene name</b> | <b><i>Cis</i>-acting elements name</b> | <b>Core sequence</b> | <b>Position</b> | <b>Length</b> | <b>Species</b>              | <b>Type</b>              |
|------------------|----------------------------------------|----------------------|-----------------|---------------|-----------------------------|--------------------------|
| <i>LcCCD1</i>    | ARE                                    | AAACCA               | 53              | 6             | <i>Zea mays</i>             | Light responsive element |
| <i>LcCCD1</i>    | ATCT-motif                             | AATCTAATCC           | 36              | 10            | <i>Pisum sativum</i>        | Light responsive element |
| <i>LcCCD1</i>    | Box 4                                  | ATTAAT               | 633             | 6             | <i>Petroselinum crispum</i> | Light responsive element |
| <i>LcCCD1</i>    | Box 4                                  | ATTAAT               | 911             | 6             | <i>Petroselinum crispum</i> | Light responsive element |
| <i>LcCCD1</i>    | Box 4                                  | ATTAAT               | 1307            | 6             | <i>Petroselinum crispum</i> | Light responsive element |
| <i>LcCCD1</i>    | Box 4                                  | ATTAAT               | 1343            | 6             | <i>Petroselinum crispum</i> | Light responsive element |
| <i>LcCCD1</i>    | CAG-motif                              | GAAAGGCAGAC          | 1126            | 10            | <i>Arabidopsis thaliana</i> | Light responsive element |
| <i>LcCCD1</i>    | CGTCA-motif                            | CGTCA                | 1727            | 5             | <i>Hordeum vulgare</i>      | Light responsive element |
| <i>LcCCD1</i>    | G-Box                                  | CACGTG               | 1912            | 6             | <i>Pisum sativum</i>        | Light responsive element |
| <i>LcCCD1</i>    | G-Box                                  | CACGTT               | 1984            | 6             | <i>Pisum sativum</i>        | Light responsive element |
| <i>LcCCD1</i>    | G-box                                  | TACGTG               | 460             | 6             | <i>Arabidopsis thaliana</i> | Light responsive element |
| <i>LcCCD1</i>    | G-box                                  | ACACGTGT             | 1911            | 8             | <i>Brassica napus</i>       | Light responsive element |
| <i>LcCCD1</i>    | G-box                                  | CACGTG               | 1912            | 6             | <i>Arabidopsis thaliana</i> | Light responsive element |
| <i>LcCCD1</i>    | GCN4_motif                             | TGAGTCA              | 1259            | 7             | <i>Oryza sativa</i>         | Light responsive element |
| <i>LcCCD1</i>    | GT1-motif                              | GGTTAAT              | 607             | 7             | <i>Avena sativa</i>         | Light responsive element |
| <i>LcCCD1</i>    | GT1-motif                              | GGTTAA               | 608             | 6             | <i>Arabidopsis thaliana</i> | Light responsive element |
| <i>LcCCD1</i>    | GT1-motif                              | GGTTAA               | 738             | 6             | <i>Arabidopsis thaliana</i> | Light responsive element |

| <b>Gene name</b>   | <b>Cis-acting elements name</b> | <b>Core sequence</b> | <b>Position</b> | <b>Length</b> | <b>Species</b>       | <b>Type</b>              |
|--------------------|---------------------------------|----------------------|-----------------|---------------|----------------------|--------------------------|
| <i>LcCCD1</i>      | GT1-motif                       | GGTTAA               | 968             | 6             | Arabidopsis thaliana | Light responsive element |
| <i>LcCCD1</i>      | GT1-motif                       | GGTTAAT              | 1687            | 7             | Avena sativa         | Light responsive element |
| <i>LcCCD1</i>      | GT1-motif                       | GGTTAA               | 1762            | 6             | Arabidopsis thaliana | Light responsive element |
| <i>LcCCD1</i>      | I-box                           | cCATATCCAAT          | 801             | 10            | Flaveria trinervia   | Light responsive element |
| <i>LcCCD1</i>      | LAMP-element                    | CTTTATCA             | 386             | 8             | Pisum sativum        | Light responsive element |
| <i>LcCCD1</i>      | LTR                             | CCGAAA               | 1644            | 6             | Hordeum vulgare      | Light responsive element |
| <i>LcCCD1</i>      | MRE                             | AACCTAA              | 1684            | 7             | Petroselinum crispum | Light responsive element |
| <i>LcCCD1</i>      | P-box                           | CCTTTTG              | 773             | 7             | Oryza sativa         | Light responsive element |
| <i>LcCCDlike-a</i> | AE-box                          | AGAAACTT             | 1710            | 8             | Arabidopsis thaliana | Light responsive element |
| <i>LcCCDlike-a</i> | ATC-motif                       | AGTAATCT             | 1021            | 8             | Spinacia oleracea    | Light responsive element |
| <i>LcCCDlike-a</i> | ATCT-motif                      | AATCTAATCC           | 659             | 9             | Pisum sativum        | Light responsive element |
| <i>LcCCDlike-a</i> | GATA-motif                      | AAGGATAAGG           | 1285            | 9             | Solanum tuberosum    | Light responsive element |
| <i>LcCCDlike-a</i> | GT1-motif                       | GGTTAA               | 1974            | 6             | Arabidopsis thaliana | Light responsive element |
| <i>LcCCDlike-a</i> | I-box                           | gGATAAGGTG           | 1153            | 9             | Zea mays             | Light responsive element |
| <i>LcCCDlike-a</i> | I-box                           | AGATAAGG             | 1155            | 8             | Triticum aestivum    | Light responsive element |
| <i>LcCCDlike-a</i> | I-box                           | AGATAAGG             | 1285            | 8             | Triticum aestivum    | Light responsive element |
| <i>LcCCDlike-a</i> | TCT-motif                       | TCTTAC               | 1865            | 6             | Arabidopsis thaliana | Light responsive element |
| <i>LcCCDlike-b</i> | G-box                           | CACGAC               | 246             | 6             | Zea mays             | Light responsive element |
| <i>LcCCDlike-b</i> | G-box                           | CACGTC               | 667             | 6             | Zea mays             | Light responsive element |

| Gene name          | Cis-acting elements name | Core sequence | Position | Length | Species              | Type                     |
|--------------------|--------------------------|---------------|----------|--------|----------------------|--------------------------|
| <i>LcCCDlike-b</i> | G-box                    | CCACGTAA      | 810      | 8      | Brassica napus       | Light responsive element |
| <i>LcCCDlike-b</i> | G-box                    | TACGTG        | 811      | 6      | Arabidopsis thaliana | Light responsive element |
| <i>LcCCDlike-b</i> | G-box                    | TACGTG        | 1080     | 6      | Arabidopsis thaliana | Light responsive element |
| <i>LcCCDlike-b</i> | G-box                    | TACGTG        | 1325     | 6      | Arabidopsis thaliana | Light responsive element |
| <i>LcCCDlike-b</i> | G-box                    | CACGTC        | 1770     | 6      | Zea mays             | Light responsive element |
| <i>LcCCDlike-b</i> | G-Box                    | CACGTT        | 1533     | 6      | Pisum sativum        | Light responsive element |
| <i>LcCCDlike-b</i> | GT1-motif                | GGTTAA        | 630      | 6      | Arabidopsis thaliana | Light responsive element |
| <i>LcCCDlike-b</i> | Box 4                    | ATTAAT        | 27       | 6      | Petroselinum crispum | Light responsive element |
| <i>LcCCDlike-b</i> | Box 4                    | ATTAAT        | 602      | 6      | Petroselinum crispum | Light responsive element |
| <i>LcCCDlike-b</i> | Box 4                    | ATTAAT        | 617      | 6      | Petroselinum crispum | Light responsive element |
| <i>LcCCDlike-b</i> | Box 4                    | ATTAAT        | 909      | 6      | Petroselinum crispum | Light responsive element |
| <i>LcCCDlike-b</i> | Box 4                    | ATTAAT        | 1286     | 6      | Petroselinum crispum | Light responsive element |
| <i>LcCCDlike-b</i> | chs-CMA2a                | TCACTTGA      | 1003     | 8      | Petroselinum crispum | Light responsive element |
| <i>LcCCDlike-b</i> | GATA-motif               | AAGGATAAGG    | 1695     | 9      | Solanum tuberosum    | Light responsive element |
| <i>LcCCDlike-b</i> | I-box                    | GTATAAGGCC    | 267      | 9      | Larix laricina       | Light responsive element |
| <i>LcCCDlike-b</i> | TCT-motif                | TCTTAC        | 593      | 6      | Arabidopsis thaliana | Light responsive element |
| <i>LcCCD4</i>      | G-box                    | TACGTG        | 1619     | 6      | Arabidopsis thaliana | Light responsive element |
| <i>LcCCD4</i>      | G-box                    | TACGTG        | 1844     | 6      | Arabidopsis thaliana | Light responsive element |
| <i>LcCCD4</i>      | G-Box                    | TCCACATGGCA   | 466      | 10     | Triticum aestivum    | Light responsive element |

| <b>Gene name</b> | <b>Cis-acting elements name</b> | <b>Core sequence</b> | <b>Position</b> | <b>Length</b> | <b>Species</b>       | <b>Type</b>              |
|------------------|---------------------------------|----------------------|-----------------|---------------|----------------------|--------------------------|
| <i>LcCCD4</i>    | GT1-motif                       | GGTTAA               | 897             | 6             | Arabidopsis thaliana | Light responsive element |
| <i>LcCCD4</i>    | Box 4                           | ATTAAT               | 1275            | 6             | Petroselinum crispum | Light responsive element |
| <i>LcCCD4</i>    | GA-motif                        | ATAGATAA             | 736             | 8             | Arabidopsis thaliana | Light responsive element |
| <i>LcCCD4</i>    | GA-motif                        | ATAGATAA             | 796             | 8             | Arabidopsis thaliana | Light responsive element |
| <i>LcCCD4</i>    | TCT-motif                       | TCTTAC               | 285             | 6             | Arabidopsis thaliana | Light responsive element |
| <i>LcCCD4</i>    | MRE                             | AACCTAA              | 1678            | 7             | Petroselinum crispum | Light responsive element |
| <i>LcCCD4a1</i>  | GT1-motif                       | GGTTAA               | 883             | 6             | Arabidopsis thaliana | Light responsive element |
| <i>LcCCD4a1</i>  | Box 4                           | ATTAAT               | 867             | 6             | Petroselinum crispum | Light responsive element |
| <i>LcCCD4a1</i>  | Box 4                           | ATTAAT               | 1567            | 6             | Petroselinum crispum | Light responsive element |
| <i>LcCCD4a1</i>  | TCT-motif                       | TCTTAC               | 567             | 6             | Arabidopsis thaliana | Light responsive element |
| <i>LcCCD4a1</i>  | AT1-motif                       | AATTATTTTTTATT       | 1545            | 13            | Solanum tuberosum    | Light responsive element |
| <i>LcCCD4a1</i>  | AE-box                          | AGAAACTT             | 1696            | 8             | Arabidopsis thaliana | Light responsive element |
| <i>LcCCD4a1</i>  | MRE                             | AACCTAA              | 467             | 7             | Petroselinum crispum | Light responsive element |
| <i>LcCCD4a1</i>  | MRE                             | AACCTAA              | 481             | 7             | Petroselinum crispum | Light responsive element |
| <i>LcCCD4a2</i>  | AAAC-motif                      | CAATCAAACCT          | 1669            | 11            | Spinacia oleracea    | Light responsive element |
| <i>LcCCD4a2</i>  | GT1-motif                       | GGTTAA               | 831             | 6             | Arabidopsis thaliana | Light responsive element |
| <i>LcCCD4a2</i>  | Sp1                             | GGGCGG               | 1819            | 6             | Oryza sativa         | Light responsive element |
| <i>LcCCD4a2</i>  | MRE                             | AACCTAA              | 411             | 7             | Petroselinum crispum | Light responsive element |
| <i>LcCCD4a2</i>  | MRE                             | AACCTAA              | 425             | 7             | Petroselinum crispum | Light responsive element |

| <b>Gene name</b> | <b>Cis-acting elements name</b> | <b>Core sequence</b> | <b>Position</b> | <b>Length</b> | <b>Species</b>       | <b>Type</b>              |
|------------------|---------------------------------|----------------------|-----------------|---------------|----------------------|--------------------------|
| <i>LcCCD4a2</i>  | ATCT-motif                      | AATCTAATCC           | 390             | 9             | Pisum sativum        | Light responsive element |
| <i>LcCCD4a2</i>  | Box 4                           | ATTAAT               | 815             | 6             | Petroselinum crispum | Light responsive element |
| <i>LcCCD4a2</i>  | Box 4                           | ATTAAT               | 990             | 6             | Petroselinum crispum | Light responsive element |
| <i>LcCCD4a2</i>  | Box 4                           | ATTAAT               | 994             | 6             | Petroselinum crispum | Light responsive element |
| <i>LcCCD4a2</i>  | Box 4                           | ATTAAT               | 1184            | 6             | Petroselinum crispum | Light responsive element |
| <i>LcCCD4a2</i>  | TCT-motif                       | TCTTAC               | 1063            | 6             | Arabidopsis thaliana | Light responsive element |
| <i>LcCCD4a2</i>  | AT1-motif                       | AATTATTTTTTATT       | 1162            | 13            | Solanum tuberosum    | Light responsive element |
| <i>LcCCD4a2</i>  | AE-box                          | AGAAACTT             | 1313            | 8             | Arabidopsis thaliana | Light responsive element |
| <i>LcCCD4b</i>   | G-Box                           | CACGTT               | 108             | 6             | Pisum sativum        | Light responsive element |
| <i>LcCCD4b</i>   | Sp1                             | GGGCGG               | 1725            | 6             | Oryza sativa         | Light responsive element |
| <i>LcCCD4b</i>   | MRE                             | AACCTAA              | 477             | 7             | Petroselinum crispum | Light responsive element |
| <i>LcCCD4b</i>   | Box 4                           | ATTAAT               | 687             | 6             | Petroselinum crispum | Light responsive element |
| <i>LcCCD4b</i>   | Box 4                           | ATTAAT               | 702             | 6             | Petroselinum crispum | Light responsive element |
| <i>LcCCD4b</i>   | Box 4                           | ATTAAT               | 747             | 6             | Petroselinum crispum | Light responsive element |
| <i>LcCCD4b</i>   | Box 4                           | ATTAAT               | 1304            | 6             | Petroselinum crispum | Light responsive element |
| <i>LcCCD4b</i>   | Box 4                           | ATTAAT               | 1539            | 6             | Petroselinum crispum | Light responsive element |
| <i>LcCCD4b</i>   | chs-CMA1a                       | TTACTTAA             | 622             | 8             | Daucus carota        | Light responsive element |
| <i>LcCCD4b</i>   | I-box                           | GTATAAGGCC           | 149             | 9             | Larix laricina       | Light responsive element |
| <i>LcCCD4b</i>   | TCT-motif                       | TCTTAC               | 626             | 6             | Arabidopsis thaliana | Light responsive element |

| Gene name       | Cis-acting elements name | Core sequence | Position | Length | Species              | Type                     |
|-----------------|--------------------------|---------------|----------|--------|----------------------|--------------------------|
| <i>LcCCD4c1</i> | G-Box                    | CACGTG        | 1376     | 6      | Pisum sativum        | Light responsive element |
| <i>LcCCD4c1</i> | G-Box                    | CACGTT        | 1475     | 6      | Pisum sativum        | Light responsive element |
| <i>LcCCD4c1</i> | G-Box                    | CACGTT        | 1613     | 6      | Pisum sativum        | Light responsive element |
| <i>LcCCD4c1</i> | G-box                    | CACGTG        | 1376     | 6      | Arabidopsis thaliana | Light responsive element |
| <i>LcCCD4c1</i> | 3-AF1 binding site       | TAAGAGAGGAA   | 871      | 10     | Solanum tuberosum    | Light responsive element |
| <i>LcCCD4c1</i> | Box 4                    | ATTAAT        | 596      | 6      | Petroselinum crispum | Light responsive element |
| <i>LcCCD4c1</i> | Box 4                    | ATTAAT        | 612      | 6      | Petroselinum crispum | Light responsive element |
| <i>LcCCD4c1</i> | Box 4                    | ATTAAT        | 806      | 6      | Petroselinum crispum | Light responsive element |
| <i>LcCCD4c1</i> | Box 4                    | ATTAAT        | 810      | 6      | Petroselinum crispum | Light responsive element |
| <i>LcCCD4c1</i> | Box 4                    | ATTAAT        | 1156     | 6      | Petroselinum crispum | Light responsive element |
| <i>LcCCD4c1</i> | chs-CMA2a                | TCACCTGA      | 1931     | 8      | Petroselinum crispum | Light responsive element |
| <i>LcCCD4c1</i> | LAMP-element             | CTTTATCA      | 208      | 8      | Pisum sativum        | Light responsive element |
| <i>LcCCD4c1</i> | TCCC-motif               | TCTCCCT       | 282      | 7      | Spinacia oleracea    | Light responsive element |
| <i>LcCCD4c1</i> | TCCC-motif               | TCTCCCT       | 1964     | 7      | Spinacia oleracea    | Light responsive element |
| <i>LcCCD4c1</i> | TCT-motif                | TCTTAC        | 898      | 6      | Arabidopsis thaliana | Light responsive element |
| <i>LcCCD4c2</i> | G-box                    | CACGTC        | 799      | 6      | Zea mays             | Light responsive element |
| <i>LcCCD4c2</i> | GT1-motif                | GGTAAAT       | 364      | 7      | Avena sativa         | Light responsive element |
| <i>LcCCD4c2</i> | GT1-motif                | GGTTAA        | 365      | 6      | Arabidopsis thaliana | Light responsive element |
| <i>LcCCD4c2</i> | MRE                      | AACCTAA       | 1284     | 7      | Petroselinum crispum | Light responsive element |

| <b>Gene name</b> | <b>Cis-acting elements name</b> | <b>Core sequence</b> | <b>Position</b> | <b>Length</b> | <b>Species</b>       | <b>Type</b>              |
|------------------|---------------------------------|----------------------|-----------------|---------------|----------------------|--------------------------|
| <i>LcCCD4c2</i>  | Box 4                           | ATTAAT               | 156             | 6             | Petroselinum crispum | Light responsive element |
| <i>LcCCD4c2</i>  | Box 4                           | ATTAAT               | 305             | 6             | Petroselinum crispum | Light responsive element |
| <i>LcCCD4c2</i>  | GA-motif                        | ATAGATAA             | 866             | 8             | Arabidopsis thaliana | Light responsive element |
| <i>LcCCD4c2</i>  | I-box                           | AAGATAAGGCT          | 1410            | 10            | Gossypium hirsutum   | Light responsive element |
| <i>LcCCD4c2</i>  | I-box                           | AGATAAGG             | 1411            | 8             | Triticum aestivum    | Light responsive element |
| <i>LcCCD4c2</i>  | L-box                           | ATCCCACCTAC          | 808             | 10            | Petroselinum crispum | Light responsive element |
| <i>LcCCD4c2</i>  | TCCC-motif                      | TCTCCCT              | 1843            | 7             | Spinacia oleracea    | Light responsive element |
| <i>LcCCD7</i>    | G-box                           | CACGAC               | 1181            | 6             | Zea mays             | Light responsive element |
| <i>LcCCD7</i>    | G-box                           | CCACGTAA             | 1212            | 8             | Brassica napus       | Light responsive element |
| <i>LcCCD7</i>    | G-box                           | TACGTG               | 1213            | 6             | Arabidopsis thaliana | Light responsive element |
| <i>LcCCD7</i>    | G-box                           | TACGTG               | 1827            | 6             | Arabidopsis thaliana | Light responsive element |
| <i>LcCCD7</i>    | ATCT-motif                      | AATCTAATCC           | 467             | 10            | Pisum sativum        | Light responsive element |
| <i>LcCCD7</i>    | ATCT-motif                      | AATCTAATCC           | 477             | 10            | Pisum sativum        | Light responsive element |
| <i>LcCCD7</i>    | ATCT-motif                      | AATCTAATCC           | 505             | 9             | Pisum sativum        | Light responsive element |
| <i>LcCCD7</i>    | Box 4                           | ATTAAT               | 50              | 6             | Petroselinum crispum | Light responsive element |
| <i>LcCCD7</i>    | Box 4                           | ATTAAT               | 460             | 6             | Petroselinum crispum | Light responsive element |
| <i>LcCCD7</i>    | Box 4                           | ATTAAT               | 464             | 6             | Petroselinum crispum | Light responsive element |
| <i>LcCCD7</i>    | Box 4                           | ATTAAT               | 567             | 6             | Petroselinum crispum | Light responsive element |
| <i>LcCCD7</i>    | Box 4                           | ATTAAT               | 1394            | 6             | Petroselinum crispum | Light responsive element |



| <b>Gene name</b> | <b>Cis-acting elements name</b> | <b>Core sequence</b> | <b>Position</b> | <b>Length</b> | <b>Species</b>       | <b>Type</b>              |
|------------------|---------------------------------|----------------------|-----------------|---------------|----------------------|--------------------------|
| <i>LcCCD7</i>    | Box 4                           | ATTAAT               | 1509            | 6             | Petroselinum crispum | Light responsive element |
| <i>LcCCD7</i>    | Box 4                           | ATTAAT               | 1562            | 6             | Petroselinum crispum | Light responsive element |
| <i>LcCCD7</i>    | Box 4                           | ATTAAT               | 1736            | 6             | Petroselinum crispum | Light responsive element |
| <i>LcCCD7</i>    | GATA-motif                      | AAGATAAGATT          | 398             | 10            | Arabidopsis thaliana | Light responsive element |
| <i>LcCCD7</i>    | TCT-motif                       | TCTTAC               | 1824            | 6             | Arabidopsis thaliana | Light responsive element |
| <i>LcCCD8a</i>   | GT1-motif                       | GGTTAAT              | 1797            | 7             | Avena sativa         | Light responsive element |
| <i>LcCCD8a</i>   | GT1-motif                       | GGTTAA               | 1798            | 6             | Arabidopsis thaliana | Light responsive element |
| <i>LcCCD8a</i>   | GT1-motif                       | GGTTAA               | 1881            | 6             | Arabidopsis thaliana | Light responsive element |
| <i>LcCCD8a</i>   | ATCT-motif                      | AATCTAATCC           | 1431            | 9             | Pisum sativum        | Light responsive element |
| <i>LcCCD8a</i>   | Box 4                           | ATTAAT               | 240             | 6             | Petroselinum crispum | Light responsive element |
| <i>LcCCD8a</i>   | Box 4                           | ATTAAT               | 460             | 6             | Petroselinum crispum | Light responsive element |
| <i>LcCCD8a</i>   | Box 4                           | ATTAAT               | 501             | 6             | Petroselinum crispum | Light responsive element |
| <i>LcCCD8a</i>   | Box 4                           | ATTAAT               | 748             | 6             | Petroselinum crispum | Light responsive element |
| <i>LcCCD8a</i>   | Box 4                           | ATTAAT               | 815             | 6             | Petroselinum crispum | Light responsive element |
| <i>LcCCD8a</i>   | chs-CMA1a                       | TTACTTAA             | 1228            | 8             | Daucus carota        | Light responsive element |
| <i>LcCCD8a</i>   | chs-CMA1a                       | TTACTTAA             | 1555            | 8             | Daucus carota        | Light responsive element |
| <i>LcCCD8a</i>   | AE-box                          | AGAAACAA             | 1518            | 8             | Arabidopsis thaliana | Light responsive element |
| <i>LcCCD8b</i>   | G-Box                           | CACGTT               | 188             | 6             | Pisum sativum        | Light responsive element |
| <i>LcCCD8b</i>   | Sp1                             | GGGCGG               | 543             | 6             | Oryza sativa         | Light responsive element |

| <b>Gene name</b> | <b>Cis-acting elements name</b> | <b>Core sequence</b> | <b>Position</b> | <b>Length</b> | <b>Species</b>              | <b>Type</b>              |
|------------------|---------------------------------|----------------------|-----------------|---------------|-----------------------------|--------------------------|
| <i>LcCCD8b</i>   | Box 4                           | ATTAAT               | 4               | 6             | <i>Petroselinum crispum</i> | Light responsive element |
| <i>LcCCD8b</i>   | Box 4                           | ATTAAT               | 364             | 6             | <i>Petroselinum crispum</i> | Light responsive element |
| <i>LcCCD8b</i>   | Box 4                           | ATTAAT               | 521             | 6             | <i>Petroselinum crispum</i> | Light responsive element |
| <i>LcCCD8b</i>   | Box 4                           | ATTAAT               | 1085            | 6             | <i>Petroselinum crispum</i> | Light responsive element |
| <i>LcCCD8b</i>   | Box 4                           | ATTAAT               | 1118            | 6             | <i>Petroselinum crispum</i> | Light responsive element |
| <i>LcCCD8b</i>   | Box 4                           | ATTAAT               | 1198            | 6             | <i>Petroselinum crispum</i> | Light responsive element |
| <i>LcCCD8b</i>   | Box 4                           | ATTAAT               | 1697            | 6             | <i>Petroselinum crispum</i> | Light responsive element |
| <i>LcCCD8b</i>   | chs-CMA1a                       | TTACTTAA             | 1251            | 8             | <i>Daucus carota</i>        | Light responsive element |
| <i>LcCCD8b</i>   | GA-motif                        | ATAGATAA             | 1599            | 8             | <i>Arabidopsis thaliana</i> | Light responsive element |
| <i>LcCCD8b</i>   | TCT-motif                       | TCTTAC               | 183             | 6             | <i>Arabidopsis thaliana</i> | Light responsive element |
| <i>LcCCD8b</i>   | TCT-motif                       | TCTTAC               | 527             | 6             | <i>Arabidopsis thaliana</i> | Light responsive element |
| <i>LcCCD8b</i>   | AE-box                          | AGAAACAA             | 957             | 8             | <i>Arabidopsis thaliana</i> | Light responsive element |
| <i>LcNCED1</i>   | G-box                           | CACGAC               | 442             | 6             | <i>Zea mays</i>             | Light responsive element |
| <i>LcNCED1</i>   | G-box                           | TAAACGTG             | 1002            | 8             | <i>Brassica oleracea</i>    | Light responsive element |
| <i>LcNCED1</i>   | G-box                           | GCCACGTGGA           | 1562            | 9             | <i>Arabidopsis thaliana</i> | Light responsive element |
| <i>LcNCED1</i>   | G-box                           | CACGTG               | 1564            | 6             | <i>Arabidopsis thaliana</i> | Light responsive element |
| <i>LcNCED1</i>   | G-box                           | CACGTC               | 1609            | 6             | <i>Zea mays</i>             | Light responsive element |
| <i>LcNCED1</i>   | G-box                           | CACGTG               | 1804            | 6             | <i>Arabidopsis thaliana</i> | Light responsive element |
| <i>LcNCED1</i>   | G-Box                           | CACGTT               | 1002            | 6             | <i>Pisum sativum</i>        | Light responsive element |

| <b>Gene name</b> | <b>Cis-acting elements name</b> | <b>Core sequence</b> | <b>Position</b> | <b>Length</b> | <b>Species</b>       | <b>Type</b>              |
|------------------|---------------------------------|----------------------|-----------------|---------------|----------------------|--------------------------|
| <i>LcNCED1</i>   | G-Box                           | CACGTG               | 1564            | 6             | Pisum sativum        | Light responsive element |
| <i>LcNCED1</i>   | G-Box                           | CACGTG               | 1804            | 6             | Pisum sativum        | Light responsive element |
| <i>LcNCED1</i>   | ATC-motif                       | AGTAATCT             | 576             | 8             | Spinacia oleracea    | Light responsive element |
| <i>LcNCED1</i>   | Box 4                           | ATTAAT               | 406             | 6             | Petroselinum crispum | Light responsive element |
| <i>LcNCED1</i>   | Box 4                           | ATTAAT               | 625             | 6             | Petroselinum crispum | Light responsive element |
| <i>LcNCED1</i>   | Box 4                           | ATTAAT               | 736             | 6             | Petroselinum crispum | Light responsive element |
| <i>LcNCED1</i>   | Box 4                           | ATTAAT               | 959             | 6             | Petroselinum crispum | Light responsive element |
| <i>LcNCED1</i>   | Box 4                           | ATTAAT               | 986             | 6             | Petroselinum crispum | Light responsive element |
| <i>LcNCED1</i>   | Box 4                           | ATTAAT               | 1178            | 6             | Petroselinum crispum | Light responsive element |
| <i>LcNCED1</i>   | GATA-motif                      | AAGATAAGATT          | 1266            | 10            | Arabidopsis thaliana | Light responsive element |
| <i>LcNCED1</i>   | LAMP-element                    | CTTTATCA             | 1364            | 8             | Pisum sativum        | Light responsive element |
| <i>LcNCED1</i>   | TCT-motif                       | TCTTAC               | 477             | 6             | Arabidopsis thaliana | Light responsive element |
| <i>LcNCED1</i>   | TCT-motif                       | TCTTAC               | 1816            | 6             | Arabidopsis thaliana | Light responsive element |
| <i>LcNCED1</i>   | AT1-motif                       | AATTATTTTTTATT       | 10              | 13            | Solanum tuberosum    | Light responsive element |
| <i>LcNCED2</i>   | G-Box                           | CACGTG               | 1571            | 6             | Pisum sativum        | Light responsive element |
| <i>LcNCED2</i>   | G-Box                           | CACGTG               | 1771            | 6             | Pisum sativum        | Light responsive element |
| <i>LcNCED2</i>   | G-box                           | GCCACGTGGA           | 1569            | 10            | Arabidopsis thaliana | Light responsive element |
| <i>LcNCED2</i>   | G-box                           | CACGTG               | 1571            | 6             | Arabidopsis thaliana | Light responsive element |
| <i>LcNCED2</i>   | G-box                           | CACGTG               | 1771            | 6             | Arabidopsis thaliana | Light responsive element |

| <b>Gene name</b> | <b>Cis-acting elements name</b> | <b>Core sequence</b> | <b>Position</b> | <b>Length</b> | <b>Species</b>       | <b>Type</b>              |
|------------------|---------------------------------|----------------------|-----------------|---------------|----------------------|--------------------------|
| <i>LcNCED2</i>   | GT1-motif                       | GGTTAAT              | 792             | 7             | Avena sativa         | Light responsive element |
| <i>LcNCED2</i>   | GT1-motif                       | GGTTAA               | 793             | 6             | Arabidopsis thaliana | Light responsive element |
| <i>LcNCED2</i>   | GT1-motif                       | GGTTAA               | 1688            | 6             | Arabidopsis thaliana | Light responsive element |
| <i>LcNCED2</i>   | Sp1                             | GGGCGG               | 1659            | 6             | Oryza sativa         | Light responsive element |
| <i>LcNCED2</i>   | ATC-motif                       | AGCTATCCA            | 1575            | 9             | Arabidopsis thaliana | Light responsive element |
| <i>LcNCED2</i>   | Box 4                           | ATTAAT               | 764             | 6             | Petroselinum crispum | Light responsive element |
| <i>LcNCED2</i>   | Box 4                           | ATTAAT               | 992             | 6             | Petroselinum crispum | Light responsive element |
| <i>LcNCED2</i>   | Box 4                           | ATTAAT               | 1211            | 6             | Petroselinum crispum | Light responsive element |
| <i>LcNCED2</i>   | Box II                          | CCACGTGGC            | 1569            | 9             | Petroselinum crispum | Light responsive element |
| <i>LcNCED2</i>   | GATA-motif                      | AAGATAAGATT          | 1029            | 10            | Arabidopsis thaliana | Light responsive element |
| <i>LcNCED3</i>   | G-box                           | CACGTC               | 426             | 6             | Zea mays             | Light responsive element |
| <i>LcNCED3</i>   | G-box                           | TACGTG               | 1169            | 6             | Arabidopsis thaliana | Light responsive element |
| <i>LcNCED3</i>   | G-box                           | CACGAC               | 1684            | 6             | Zea mays             | Light responsive element |
| <i>LcNCED3</i>   | G-box                           | CACGTG               | 1813            | 6             | Arabidopsis thaliana | Light responsive element |
| <i>LcNCED3</i>   | G-Box                           | CACGTT               | 448             | 6             | Pisum sativum        | Light responsive element |
| <i>LcNCED3</i>   | G-Box                           | CACGTT               | 956             | 6             | Pisum sativum        | Light responsive element |
| <i>LcNCED3</i>   | G-Box                           | CACGTG               | 1813            | 6             | Pisum sativum        | Light responsive element |
| <i>LcNCED3</i>   | ATCT-motif                      | AATCTAATCC           | 1539            | 9             | Pisum sativum        | Light responsive element |
| <i>LcNCED3</i>   | Box 4                           | ATTAAT               | 268             | 6             | Petroselinum crispum | Light responsive element |

| <b>Gene name</b>   | <b>Cis-acting elements name</b> | <b>Core sequence</b> | <b>Position</b> | <b>Length</b> | <b>Species</b>       | <b>Type</b>                      |
|--------------------|---------------------------------|----------------------|-----------------|---------------|----------------------|----------------------------------|
| <i>LcNCED3</i>     | Box 4                           | ATTAAT               | 544             | 6             | Petroselinum crispum | Light responsive element         |
| <i>LcNCED3</i>     | Box 4                           | ATTAAT               | 622             | 6             | Petroselinum crispum | Light responsive element         |
| <i>LcNCED3</i>     | Box 4                           | ATTAAT               | 810             | 6             | Petroselinum crispum | Light responsive element         |
| <i>LcNCED3</i>     | GATA-motif                      | GATAGGG              | 148             | 7             | Pisum sativum        | Light responsive element         |
| <i>LcNCED3</i>     | GATA-motif                      | GATAGGA              | 247             | 7             | Arabidopsis thaliana | Light responsive element         |
| <i>LcNCED3</i>     | TCT-motif                       | TCTTAC               | 1481            | 6             | Arabidopsis thaliana | Light responsive element         |
| <i>LcCCD1</i>      | ABRE                            | ACGTG                | 460             | 5             | Arabidopsis thaliana | Abscisic acid responsive element |
| <i>LcCCD1</i>      | ABRE                            | ACGTG                | 1680            | 5             | Arabidopsis thaliana | Abscisic acid responsive element |
| <i>LcCCD1</i>      | ABRE                            | CACGTG               | 1912            | 6             | Arabidopsis thaliana | Abscisic acid responsive element |
| <i>LcCCD1</i>      | ABRE                            | ACGTG                | 1913            | 5             | Arabidopsis thaliana | Abscisic acid responsive element |
| <i>LcCCD1</i>      | ABRE                            | ACGTG                | 1984            | 5             | Arabidopsis thaliana | Abscisic acid responsive element |
| <i>LcCCDlike-b</i> | ABRE                            | ACGTG                | 668             | 5             | Arabidopsis thaliana | Abscisic acid responsive element |
| <i>LcCCDlike-b</i> | ABRE                            | ACGTG                | 811             | 5             | Arabidopsis thaliana | Abscisic acid responsive element |
| <i>LcCCDlike-b</i> | ABRE                            | ACGTG                | 1081            | 5             | Arabidopsis thaliana | Abscisic acid responsive element |
| <i>LcCCDlike-b</i> | ABRE                            | CGTACGTGCA           | 1323            | 9             | Hordeum vulgare      | Abscisic acid responsive element |
| <i>LcCCDlike-b</i> | ABRE                            | ACGTG                | 1325            | 5             | Arabidopsis thaliana | Abscisic acid responsive element |
| <i>LcCCDlike-b</i> | ABRE                            | ACGTG                | 1533            | 5             | Arabidopsis thaliana | Abscisic acid responsive element |
| <i>LcCCDlike-b</i> | ABRE                            | ACGTG                | 1771            | 5             | Arabidopsis thaliana | Abscisic acid responsive element |
| <i>LcCCD4</i>      | ABRE                            | ACGTG                | 1620            | 5             | Arabidopsis thaliana | Abscisic acid responsive element |

| <b>Gene name</b> | <b>Cis-acting elements name</b> | <b>Core sequence</b> | <b>Position</b> | <b>Length</b> | <b>Species</b>       | <b>Type</b>                      |
|------------------|---------------------------------|----------------------|-----------------|---------------|----------------------|----------------------------------|
| <i>LcCCD4</i>    | ABRE                            | ACGTG                | 1844            | 5             | Arabidopsis thaliana | Abscisic acid responsive element |
| <i>LcCCD4b</i>   | ABRE                            | ACGTG                | 109             | 5             | Arabidopsis thaliana | Abscisic acid responsive element |
| <i>LcCCD4c1</i>  | ABRE                            | CGCACGTGTC           | 1374            | 9             | Hordeum vulgare      | Abscisic acid responsive element |
| <i>LcCCD4c1</i>  | ABRE                            | CACGTG               | 1376            | 6             | Arabidopsis thaliana | Abscisic acid responsive element |
| <i>LcCCD4c1</i>  | ABRE                            | ACGTG                | 1377            | 5             | Arabidopsis thaliana | Abscisic acid responsive element |
| <i>LcCCD4c1</i>  | ABRE                            | ACGTG                | 1475            | 5             | Arabidopsis thaliana | Abscisic acid responsive element |
| <i>LcCCD4c1</i>  | ABRE                            | ACGTG                | 1613            | 5             | Arabidopsis thaliana | Abscisic acid responsive element |
| <i>LcCCD4c2</i>  | ABRE                            | ACGTG                | 800             | 5             | Arabidopsis thaliana | Abscisic acid responsive element |
| <i>LcCCD7</i>    | ABRE                            | ACGTG                | 1213            | 5             | Arabidopsis thaliana | Abscisic acid responsive element |
| <i>LcCCD7</i>    | ABRE                            | ACGTG                | 1828            | 5             | Arabidopsis thaliana | Abscisic acid responsive element |
| <i>LcCCD8b</i>   | ABRE                            | ACGTG                | 188             | 5             | Arabidopsis thaliana | Abscisic acid responsive element |
| <i>LcNCED1</i>   | ABRE                            | ACGTG                | 1002            | 5             | Arabidopsis thaliana | Abscisic acid responsive element |
| <i>LcNCED1</i>   | ABRE                            | GACACGTGGC           | 1562            | 9             | Triticum aestivum    | Abscisic acid responsive element |
| <i>LcNCED1</i>   | ABRE                            | CACGTG               | 1564            | 6             | Arabidopsis thaliana | Abscisic acid responsive element |
| <i>LcNCED1</i>   | ABRE                            | ACGTG                | 1565            | 5             | Arabidopsis thaliana | Abscisic acid responsive element |
| <i>LcNCED1</i>   | ABRE                            | ACGTG                | 1610            | 5             | Arabidopsis thaliana | Abscisic acid responsive element |
| <i>LcNCED1</i>   | ABRE                            | CACGTG               | 1804            | 6             | Arabidopsis thaliana | Abscisic acid responsive element |
| <i>LcNCED1</i>   | ABRE                            | ACGTG                | 1805            | 5             | Arabidopsis thaliana | Abscisic acid responsive element |
| <i>LcNCED2</i>   | ABRE                            | CACGTG               | 1571            | 6             | Arabidopsis thaliana | Abscisic acid responsive element |

| <b>Gene name</b>   | <b>Cis-acting elements name</b> | <b>Core sequence</b> | <b>Position</b> | <b>Length</b> | <b>Species</b>       | <b>Type</b>                      |
|--------------------|---------------------------------|----------------------|-----------------|---------------|----------------------|----------------------------------|
| <i>LcNCED2</i>     | ABRE                            | ACGTG                | 1572            | 5             | Arabidopsis thaliana | Abscisic acid responsive element |
| <i>LcNCED2</i>     | ABRE                            | CACGTG               | 1771            | 6             | Arabidopsis thaliana | Abscisic acid responsive element |
| <i>LcNCED2</i>     | ABRE                            | ACGTG                | 1772            | 5             | Arabidopsis thaliana | Abscisic acid responsive element |
| <i>LcNCED3</i>     | ABRE                            | ACGTG                | 426             | 5             | Arabidopsis thaliana | Abscisic acid responsive element |
| <i>LcNCED3</i>     | ABRE                            | ACGTG                | 448             | 5             | Arabidopsis thaliana | Abscisic acid responsive element |
| <i>LcNCED3</i>     | ABRE                            | ACGTG                | 956             | 5             | Arabidopsis thaliana | Abscisic acid responsive element |
| <i>LcNCED3</i>     | ABRE                            | GACACGTACGT          | 1163            | 10            | Oryza sativa         | Abscisic acid responsive element |
| <i>LcNCED3</i>     | ABRE                            | ACGTG                | 1170            | 5             | Arabidopsis thaliana | Abscisic acid responsive element |
| <i>LcNCED3</i>     | ABRE                            | CACGTG               | 1813            | 6             | Arabidopsis thaliana | Abscisic acid responsive element |
| <i>LcNCED3</i>     | ABRE                            | ACGTG                | 1814            | 5             | Arabidopsis thaliana | Abscisic acid responsive element |
| <i>LcCCD1</i>      | TGA-element                     | AACGAC               | 756             | 6             | Brassica oleracea    | Auxin responsive element         |
| <i>LcCCDlike-b</i> | TGA-element                     | AACGAC               | 238             | 6             | Brassica oleracea    | Auxin responsive element         |
| <i>LcCCDlike-b</i> | AuxRR-core                      | GGTCCAT              | 283             | 7             | Nicotiana tabacum    | Auxin responsive element         |
| <i>LcCCD4c1</i>    | TGA-element                     | AACGAC               | 1289            | 6             | Brassica oleracea    | Auxin responsive element         |
| <i>LcCCD4c1</i>    | AuxRR-core                      | GGTCCAT              | 1581            | 7             | Nicotiana tabacum    | Auxin responsive element         |
| <i>LcCCD4c2</i>    | TGA-element                     | AACGAC               | 387             | 6             | Brassica oleracea    | Auxin responsive element         |
| <i>LcCCD7</i>      | TGA-element                     | AACGAC               | 1229            | 6             | Brassica oleracea    | Auxin responsive element         |
| <i>LcCCD8b</i>     | AuxRR-core                      | GGTCCAT              | 155             | 7             | Nicotiana tabacum    | Auxin responsive element         |
| <i>LcCCD1</i>      | G-Box                           | CACGTT               | 1680            | 6             | Pisum sativum        | Gibberellin responsive element   |

| <b>Gene name</b>   | <b>Cis-acting elements name</b> | <b>Core sequence</b> | <b>Position</b> | <b>Length</b> | <b>Species</b>    | <b>Type</b>                    |
|--------------------|---------------------------------|----------------------|-----------------|---------------|-------------------|--------------------------------|
| <i>LcCCD1</i>      | TCA-element                     | CCATCTTTT            | 1383            | 9             | Nicotiana tabacum | Gibberellin responsive element |
| <i>LcCCDlike-a</i> | GARE-motif                      | TCTGTTG              | 502             | 7             | Brassica oleracea | Gibberellin responsive element |
| <i>LcCCDlike-a</i> | TATC-box                        | TATCCCA              | 589             | 7             | Oryza sativa      | Gibberellin responsive element |
| <i>LcCCDlike-b</i> | GARE-motif                      | TCTGTTG              | 1765            | 7             | Brassica oleracea | Gibberellin responsive element |
| <i>LcCCD4a1</i>    | P-box                           | CCTTTTG              | 701             | 7             | Oryza sativa      | Gibberellin responsive element |
| <i>LcCCD4a2</i>    | P-box                           | CCTTTTG              | 651             | 7             | Oryza sativa      | Gibberellin responsive element |
| <i>LcCCD4b</i>     | TATC-box                        | TATCCCA              | 1040            | 7             | Oryza sativa      | Gibberellin responsive element |
| <i>LcCCD4c1</i>    | TATC-box                        | TATCCCA              | 560             | 7             | Oryza sativa      | Gibberellin responsive element |
| <i>LcCCD4c1</i>    | GARE-motif                      | TCTGTTG              | 1518            | 7             | Brassica oleracea | Gibberellin responsive element |
| <i>LcCCD4c1</i>    | P-box                           | CCTTTTG              | 978             | 7             | Oryza sativa      | Gibberellin responsive element |
| <i>LcCCD4c2</i>    | GARE-motif                      | TCTGTTG              | 1226            | 7             | Brassica oleracea | Gibberellin responsive element |
| <i>LcCCD7</i>      | GARE-motif                      | TCTGTTG              | 754             | 7             | Brassica oleracea | Gibberellin responsive element |
| <i>LcNCED2</i>     | TATC-box                        | TATCCCA              | 1374            | 7             | Oryza sativa      | Gibberellin responsive element |
| <i>LcNCED2</i>     | P-box                           | CCTTTTG              | 1590            | 7             | Oryza sativa      | Gibberellin responsive element |
| <i>LcNCED3</i>     | P-box                           | CCTTTTG              | 553             | 7             | Oryza sativa      | Gibberellin responsive element |
| <i>LcCCD1</i>      | TGACG-motif                     | TGACG                | 1727            | 5             | Hordeum vulgare   | MeJA responsive element        |
| <i>LcCCD1</i>      | GARE-motif                      | TCTGTTG              | 1105            | 7             | Brassica oleracea | MeJA responsive element        |
| <i>LcCCDlike-b</i> | CGTCA-motif                     | CGTCA                | 428             | 5             | Hordeum vulgare   | MeJA responsive element        |
| <i>LcCCDlike-b</i> | CGTCA-motif                     | CGTCA                | 666             | 5             | Hordeum vulgare   | MeJA responsive element        |



| <b>Gene name</b>   | <b>Cis-acting elements name</b> | <b>Core sequence</b> | <b>Position</b> | <b>Length</b> | <b>Species</b>  | <b>Type</b>             |
|--------------------|---------------------------------|----------------------|-----------------|---------------|-----------------|-------------------------|
| <i>LcCCDlike-b</i> | TGACG-motif                     | TGACG                | 428             | 5             | Hordeum vulgare | MeJA responsive element |
| <i>LcCCDlike-b</i> | TGACG-motif                     | TGACG                | 666             | 5             | Hordeum vulgare | MeJA responsive element |
| <i>LcCCD4</i>      | CGTCA-motif                     | CGTCA                | 370             | 5             | Hordeum vulgare | MeJA responsive element |
| <i>LcCCD4</i>      | TGACG-motif                     | TGACG                | 370             | 5             | Hordeum vulgare | MeJA responsive element |
| <i>LcCCD4a1</i>    | CGTCA-motif                     | CGTCA                | 393             | 5             | Hordeum vulgare | MeJA responsive element |
| <i>LcCCD4a1</i>    | CGTCA-motif                     | CGTCA                | 1516            | 5             | Hordeum vulgare | MeJA responsive element |
| <i>LcCCD4a1</i>    | TGACG-motif                     | TGACG                | 393             | 5             | Hordeum vulgare | MeJA responsive element |
| <i>LcCCD4a1</i>    | TGACG-motif                     | TGACG                | 1516            | 5             | Hordeum vulgare | MeJA responsive element |
| <i>LcCCD4a2</i>    | CGTCA-motif                     | CGTCA                | 569             | 5             | Hordeum vulgare | MeJA responsive element |
| <i>LcCCD4a2</i>    | TGACG-motif                     | TGACG                | 569             | 5             | Hordeum vulgare | MeJA responsive element |
| <i>LcCCD4b</i>     | CGTCA-motif                     | CGTCA                | 1455            | 5             | Hordeum vulgare | MeJA responsive element |
| <i>LcCCD4b</i>     | CGTCA-motif                     | CGTCA                | 1846            | 5             | Hordeum vulgare | MeJA responsive element |
| <i>LcCCD4b</i>     | TGACG-motif                     | TGACG                | 1455            | 5             | Hordeum vulgare | MeJA responsive element |
| <i>LcCCD4b</i>     | TGACG-motif                     | TGACG                | 1846            | 5             | Hordeum vulgare | MeJA responsive element |
| <i>LcCCD4c2</i>    | CGTCA-motif                     | CGTCA                | 798             | 5             | Hordeum vulgare | MeJA responsive element |
| <i>LcCCD4c2</i>    | TGACG-motif                     | TGACG                | 798             | 5             | Hordeum vulgare | MeJA responsive element |
| <i>LcCCD7</i>      | CGTCA-motif                     | CGTCA                | 1024            | 5             | Hordeum vulgare | MeJA responsive element |
| <i>LcCCD7</i>      | TGACG-motif                     | TGACG                | 1024            | 5             | Hordeum vulgare | MeJA responsive element |
| <i>LcNCED1</i>     | CGTCA-motif                     | CGTCA                | 1608            | 5             | Hordeum vulgare | MeJA responsive element |

| <b>Gene name</b>   | <b>Cis-acting elements name</b> | <b>Core sequence</b> | <b>Position</b> | <b>Length</b> | <b>Species</b>       | <b>Type</b>                       |
|--------------------|---------------------------------|----------------------|-----------------|---------------|----------------------|-----------------------------------|
| <i>LcNCED1</i>     | TGACG-motif                     | TGACG                | 1608            | 5             | Hordeum vulgare      | MeJA responsive element           |
| <i>LcNCED2</i>     | CGTCA-motif                     | CGTCA                | 1547            | 5             | Hordeum vulgare      | MeJA responsive element           |
| <i>LcNCED2</i>     | TGACG-motif                     | TGACG                | 1547            | 5             | Hordeum vulgare      | MeJA responsive element           |
| <i>LcNCED3</i>     | CGTCA-motif                     | CGTCA                | 428             | 5             | Hordeum vulgare      | MeJA responsive element           |
| <i>LcNCED3</i>     | CGTCA-motif                     | CGTCA                | 1100            | 5             | Hordeum vulgare      | MeJA responsive element           |
| <i>LcNCED3</i>     | CGTCA-motif                     | CGTCA                | 1103            | 5             | Hordeum vulgare      | MeJA responsive element           |
| <i>LcNCED3</i>     | TGACG-motif                     | TGACG                | 428             | 5             | Hordeum vulgare      | MeJA responsive element           |
| <i>LcNCED3</i>     | TGACG-motif                     | TGACG                | 1100            | 5             | Hordeum vulgare      | MeJA responsive element           |
| <i>LcNCED3</i>     | TGACG-motif                     | TGACG                | 1103            | 5             | Hordeum vulgare      | MeJA responsive element           |
| <i>LcCCD1</i>      | TCT-motif                       | TCTTAC               | 797             | 6             | Arabidopsis thaliana | Salicylic acid responsive element |
| <i>LcCCD4a2</i>    | TCA-element                     | TCAGAAGAGG           | 351             | 9             | Brassica oleracea    | Salicylic acid responsive element |
| <i>LcCCD8a</i>     | TCA-element                     | CCATCTTTTT           | 862             | 9             | Nicotiana tabacum    | Salicylic acid responsive element |
| <i>LcNCED1</i>     | TCA-element                     | CCATCTTTTT           | 1473            | 9             | Nicotiana tabacum    | Salicylic acid responsive element |
| <i>LcNCED2</i>     | TCA-element                     | CCATCTTTTT           | 474             | 9             | Nicotiana tabacum    | Salicylic acid responsive element |
| <i>LcCCD1</i>      | ARE                             | AAACCA               | 560             | 6             | Zea mays             | Anaerobic induction element       |
| <i>LcCCD1</i>      | ARE                             | AAACCA               | 931             | 6             | Zea mays             | Anaerobic induction element       |
| <i>LcCCD1</i>      | ARE                             | AAACCA               | 1225            | 6             | Zea mays             | Anaerobic induction element       |
| <i>LcCCD1</i>      | ATC-motif                       | AGTAATCT             | 1109            | 8             | Spinacia oleracea    | Anaerobic induction element       |
| <i>LcCCDlike-a</i> | ARE                             | AAACCA               | 388             | 6             | Zea mays             | Anaerobic induction element       |

| Gene name          | Cis-acting elements name | Core sequence | Position | Length | Species  | Type                        |
|--------------------|--------------------------|---------------|----------|--------|----------|-----------------------------|
| <i>LcCCDlike-a</i> | ARE                      | AAACCA        | 1301     | 6      | Zea mays | Anaerobic induction element |
| <i>LcCCDlike-a</i> | ARE                      | AAACCA        | 1572     | 6      | Zea mays | Anaerobic induction element |
| <i>LcCCDlike-a</i> | ARE                      | AAACCA        | 1662     | 6      | Zea mays | Anaerobic induction element |
| <i>LcCCD4</i>      | ARE                      | AAACCA        | 1245     | 6      | Zea mays | Anaerobic induction element |
| <i>LcCCD4</i>      | ARE                      | AAACCA        | 1381     | 6      | Zea mays | Anaerobic induction element |
| <i>LcCCD4</i>      | ARE                      | AAACCA        | 1730     | 6      | Zea mays | Anaerobic induction element |
| <i>LcCCD4a1</i>    | ARE                      | AAACCA        | 172      | 6      | Zea mays | Anaerobic induction element |
| <i>LcCCD4a1</i>    | ARE                      | AAACCA        | 193      | 6      | Zea mays | Anaerobic induction element |
| <i>LcCCD4a1</i>    | ARE                      | AAACCA        | 323      | 6      | Zea mays | Anaerobic induction element |
| <i>LcCCD4a1</i>    | GC-motif                 | CCCCCG        | 1723     | 6      | Zea mays | Anaerobic induction element |
| <i>LcCCD4a2</i>    | ARE                      | AAACCA        | 280      | 6      | Zea mays | Anaerobic induction element |
| <i>LcCCD4a2</i>    | ARE                      | AAACCA        | 306      | 6      | Zea mays | Anaerobic induction element |
| <i>LcCCD4a2</i>    | GC-motif                 | CCCCCG        | 1340     | 6      | Zea mays | Anaerobic induction element |
| <i>LcCCD4b</i>     | ARE                      | AAACCA        | 936      | 6      | Zea mays | Anaerobic induction element |
| <i>LcCCD4c1</i>    | ARE                      | AAACCA        | 1735     | 6      | Zea mays | Anaerobic induction element |
| <i>LcCCD4c1</i>    | ARE                      | AAACCA        | 1852     | 6      | Zea mays | Anaerobic induction element |
| <i>LcCCD7</i>      | ARE                      | AAACCA        | 392      | 6      | Zea mays | Anaerobic induction element |
| <i>LcCCD7</i>      | ARE                      | AAACCA        | 1535     | 6      | Zea mays | Anaerobic induction element |
| <i>LcCCD7</i>      | ARE                      | AAACCA        | 1882     | 6      | Zea mays | Anaerobic induction element |

| Gene name          | Cis-acting elements name | Core sequence | Position | Length | Species                     | Type                                              |
|--------------------|--------------------------|---------------|----------|--------|-----------------------------|---------------------------------------------------|
| <i>LcCCD8b</i>     | ARE                      | AAACCA        | 711      | 6      | <i>Zea mays</i>             | Anaerobic induction element                       |
| <i>LcNCED1</i>     | ARE                      | AAACCA        | 798      | 6      | <i>Zea mays</i>             | Anaerobic induction element                       |
| <i>LcNCED1</i>     | ARE                      | AAACCA        | 1352     | 6      | <i>Zea mays</i>             | Anaerobic induction element                       |
| <i>LcNCED2</i>     | ARE                      | AAACCA        | 1223     | 6      | <i>Zea mays</i>             | Anaerobic induction element                       |
| <i>LcNCED2</i>     | ARE                      | AAACCA        | 1932     | 6      | <i>Zea mays</i>             | Anaerobic induction element                       |
| <i>LcNCED2</i>     | ARE                      | AAACCA        | 1944     | 6      | <i>Zea mays</i>             | Anaerobic induction element                       |
| <i>LcNCED3</i>     | ARE                      | AAACCA        | 1335     | 6      | <i>Zea mays</i>             | Anaerobic induction element                       |
| <i>LcNCED3</i>     | ARE                      | AAACCA        | 1372     | 6      | <i>Zea mays</i>             | Anaerobic induction element                       |
| <i>LcNCED3</i>     | ARE                      | AAACCA        | 1538     | 6      | <i>Zea mays</i>             | Anaerobic induction element                       |
| <i>LcNCED3</i>     | ARE                      | AAACCA        | 1698     | 6      | <i>Zea mays</i>             | Anaerobic induction element                       |
| <i>LcCCDlike-a</i> | MBS                      | CAACTG        | 993      | 6      | <i>Arabidopsis thaliana</i> | MYB binding site involved in drought-inducibility |
| <i>LcCCDlike-a</i> | MBS                      | CAACTG        | 1040     | 6      | <i>Arabidopsis thaliana</i> | MYB binding site involved in drought-inducibility |
| <i>LcCCDlike-a</i> | MBS                      | CAACTG        | 1054     | 6      | <i>Arabidopsis thaliana</i> | MYB binding site involved in drought-inducibility |
| <i>LcCCDlike-a</i> | MBS                      | CAACTG        | 1247     | 6      | <i>Arabidopsis thaliana</i> | MYB binding site involved in drought-inducibility |
| <i>LcCCDlike-b</i> | MBS                      | CAACTG        | 1401     | 6      | <i>Arabidopsis thaliana</i> | MYB binding site involved in drought-inducibility |
| <i>LcCCDlike-b</i> | MBS                      | CAACTG        | 1455     | 6      | <i>Arabidopsis thaliana</i> | MYB binding site involved in drought-inducibility |
| <i>LcCCDlike-b</i> | MBS                      | CAACTG        | 1982     | 6      | <i>Arabidopsis thaliana</i> | MYB binding site involved in drought-inducibility |
| <i>LcCCD4</i>      | MBS                      | CAACTG        | 679      | 6      | <i>Arabidopsis thaliana</i> | MYB binding site involved in drought-inducibility |
| <i>LcCCD4a1</i>    | MBS                      | CAACTG        | 804      | 6      | <i>Arabidopsis thaliana</i> | MYB binding site involved in drought-inducibility |

| <b>Gene name</b>   | <b>Cis-acting elements name</b> | <b>Core sequence</b> | <b>Position</b> | <b>Length</b> | <b>Species</b>       | <b>Type</b>                                       |
|--------------------|---------------------------------|----------------------|-----------------|---------------|----------------------|---------------------------------------------------|
| <i>LcCCD4a2</i>    | MBS                             | CAACTG               | 752             | 6             | Arabidopsis thaliana | MYB binding site involved in drought-inducibility |
| <i>LcCCD4a2</i>    | MBS                             | CAACTG               | 1192            | 6             | Arabidopsis thaliana | MYB binding site involved in drought-inducibility |
| <i>LcCCD4c2</i>    | MBS                             | CAACTG               | 1988            | 6             | Arabidopsis thaliana | MYB binding site involved in drought-inducibility |
| <i>LcCCD8b</i>     | MBS                             | CAACTG               | 1747            | 6             | Arabidopsis thaliana | MYB binding site involved in drought-inducibility |
| <i>LcNCED1</i>     | MBS                             | CAACTG               | 319             | 6             | Arabidopsis thaliana | MYB binding site involved in drought-inducibility |
| <i>LcNCED2</i>     | MBS                             | CAACTG               | 1319            | 6             | Arabidopsis thaliana | MYB binding site involved in drought-inducibility |
| <i>LcCCD1</i>      | MRE                             | AACCTAA              | 1031            | 7             | Petroselinum crispum | Low-temperature responsive element                |
| <i>LcCCDlike-b</i> | LTR                             | CCGAAA               | 1636            | 6             | Hordeum vulgare      | Low-temperature responsive element                |
| <i>LcCCD4a1</i>    | LTR                             | CCGAAA               | 261             | 6             | Hordeum vulgare      | Low-temperature responsive element                |
| <i>LcCCD4a1</i>    | LTR                             | CCGAAA               | 1396            | 6             | Hordeum vulgare      | Low-temperature responsive element                |
| <i>LcCCD4a2</i>    | LTR                             | CCGAAA               | 218             | 6             | Hordeum vulgare      | Low-temperature responsive element                |
| <i>LcCCD4c2</i>    | LTR                             | CCGAAA               | 255             | 6             | Hordeum vulgare      | Low-temperature responsive element                |
| <i>LcCCD4c2</i>    | LTR                             | CCGAAA               | 544             | 6             | Hordeum vulgare      | Low-temperature responsive element                |
| <i>LcCCD4c2</i>    | LTR                             | CCGAAA               | 641             | 6             | Hordeum vulgare      | Low-temperature responsive element                |
| <i>LcCCD4c2</i>    | LTR                             | CCGAAA               | 738             | 6             | Hordeum vulgare      | Low-temperature responsive element                |
| <i>LcCCD7</i>      | LTR                             | CCGAAA               | 682             | 6             | Hordeum vulgare      | Low-temperature responsive element                |
| <i>LcCCD8b</i>     | LTR                             | CCGAAA               | 67              | 6             | Hordeum vulgare      | Low-temperature responsive element                |
| <i>LcNCED2</i>     | LTR                             | CCGAAA               | 1610            | 6             | Hordeum vulgare      | Low-temperature responsive element                |
| <i>LcCCDlike-b</i> | TC-rich repeats                 | ATTCTCTAAC           | 1795            | 9             | Nicotiana tabacum    | Defense and stress-responsive element             |

| <b>Gene name</b>   | <b>Cis-acting elements name</b> | <b>Core sequence</b> | <b>Position</b> | <b>Length</b> | <b>Species</b>       | <b>Type</b>                                                          |
|--------------------|---------------------------------|----------------------|-----------------|---------------|----------------------|----------------------------------------------------------------------|
| <i>LcCCD4b</i>     | TC-rich repeats                 | GTTTCTTAC            | 231             | 9             | Nicotiana tabacum    | Defense and stress-responsive element                                |
| <i>LcCCD4c1</i>    | TC-rich repeats                 | GTTTCTTAC            | 839             | 9             | Nicotiana tabacum    | Defense and stress-responsive element                                |
| <i>LcCCD4c1</i>    | TC-rich repeats                 | GTTTCTTAC            | 898             | 9             | Nicotiana tabacum    | Defense and stress-responsive element                                |
| <i>LcCCD8a</i>     | TC-rich repeats                 | ATTCTCTAAC           | 1502            | 9             | Nicotiana tabacum    | Defense and stress-responsive element                                |
| <i>LcNCED1</i>     | TC-rich repeats                 | GTTTCTTAC            | 477             | 9             | Nicotiana tabacum    | Defense and stress-responsive element                                |
| <i>LcNCED2</i>     | TC-rich repeats                 | GTTTCTTAC            | 523             | 9             | Nicotiana tabacum    | Defense and stress-responsive element                                |
| <i>LcNCED3</i>     | TC-rich repeats                 | GTTTCTTAC            | 1477            | 9             | Nicotiana tabacum    | Defense and stress-responsive element                                |
| <i>LcNCED3</i>     | TC-rich repeats                 | GTTTCTTAC            | 1781            | 9             | Nicotiana tabacum    | Defense and stress-responsive element                                |
| <i>LcCCD4c2</i>    | MBSI                            | aaaAaaC(G/C)GTTA     | 50              | 10.5          | Petunia hybrida      | MYB binding site involved in flavonoid biosynthetic genes regulation |
| <i>LcCCD8b</i>     | MBSI                            | TTTTTACGGTTA         | 1642            | 11            | Petunia hybrida      | MYB binding site involved in flavonoid biosynthetic genes regulation |
| <i>LcCCDlike-a</i> | CAT-box                         | GCCACT               | 257             | 6             | Arabidopsis thaliana | Meristem expression element                                          |
| <i>LcCCD4</i>      | CAT-box                         | GCCACT               | 496             | 6             | Arabidopsis thaliana | Meristem expression element                                          |
| <i>LcCCD4b</i>     | CAT-box                         | GCCACT               | 470             | 6             | Arabidopsis thaliana | Meristem expression element                                          |
| <i>LcCCD4b</i>     | CAT-box                         | GCCACT               | 1841            | 6             | Arabidopsis thaliana | Meristem expression element                                          |
| <i>LcCCD4c1</i>    | CAT-box                         | GCCACT               | 1397            | 6             | Arabidopsis thaliana | Meristem expression element                                          |
| <i>LcCCD8a</i>     | CAT-box                         | GCCACT               | 699             | 6             | Arabidopsis thaliana | Meristem expression element                                          |
| <i>LcCCD8b</i>     | CAT-box                         | GCCACT               | 108             | 6             | Arabidopsis thaliana | Meristem expression element                                          |
| <i>LcNCED2</i>     | CAT-box                         | GCCACT               | 498             | 6             | Arabidopsis thaliana | Meristem expression element                                          |
| <i>LcNCED3</i>     | CAT-box                         | GCCACT               | 978             | 6             | Arabidopsis thaliana | Meristem expression element                                          |

| <b>Gene name</b>   | <b>Cis-acting elements name</b> | <b>Core sequence</b>   | <b>Position</b> | <b>Length</b> | <b>Species</b>          | <b>Type</b>                        |
|--------------------|---------------------------------|------------------------|-----------------|---------------|-------------------------|------------------------------------|
| <i>LcNCED3</i>     | CAT-box                         | GCCACT                 | 1742            | 6             | Arabidopsis thaliana    | Meristem expression element        |
| <i>LcCCD1</i>      | GT1-motif                       | GTGTGTGAA              | 446             | 9             | Solanum tuberosum       | Endosperm expression element       |
| <i>LcCCDlike-a</i> | GCN4_motif                      | TGAGTCA                | 1400            | 7             | Oryza sativa            | Endosperm expression element       |
| <i>LcCCD4</i>      | GCN4_motif                      | TGAGTCA                | 1386            | 7             | Oryza sativa            | Endosperm expression element       |
| <i>LcCCD7</i>      | GCN4_motif                      | TGAGTCA                | 841             | 7             | Oryza sativa            | Endosperm expression element       |
| <i>LcCCDlike-a</i> | circadian                       | CAAAGATATC             | 399             | 9             | Lycopersicon esculentum | Circadian responsive element       |
| <i>LcCCD4b</i>     | circadian                       | CAAAGATATC             | 36              | 9             | Lycopersicon esculentum | Circadian responsive element       |
| <i>LcCCD4c1</i>    | circadian                       | CAAAGATATC             | 223             | 9             | Lycopersicon esculentum | Circadian responsive element       |
| <i>LcNCED1</i>     | RY-element                      | CATGCATG               | 217             | 8             | Helianthus annuus       | Seed-specific regulatory element   |
| <i>LcCCDlike-b</i> | O2-site                         | GATGA(C/T)(A/G)TG(A/G) | 411             | 8             | Zea mays                | Zein metabolism regulatory element |
| <i>LcCCD4</i>      | O2-site                         | GATGACATGG             | 1891            | 9             | Zea mays                | Zein metabolism regulatory element |
| <i>LcCCD4a2</i>    | O2-site                         | GATGACATGG             | 335             | 9             | Zea mays                | Zein metabolism regulatory element |
| <i>LcCCD7</i>      | O2-site                         | GATGACATGG             | 1538            | 9             | Zea mays                | Zein metabolism regulatory element |
| <i>LcCCD8b</i>     | O2-site                         | GATGA(C/T)(A/G)TG(A/G) | 1054            | 8.5           | Zea mays                | Zein metabolism regulatory element |

**Supplement Table S3. Two-dimensional structures of LcCCO proteins.**

| Gene name          | Sequence length | Core Sequence Position Length |                      |                  |
|--------------------|-----------------|-------------------------------|----------------------|------------------|
|                    |                 | Alpha helix (Hh)              | Extended strand (Ee) | Random coil (Cc) |
| <i>LcCCD1</i>      | 1434            | 412/28.73%                    | 302/21.06%           | 720/50.21%       |
| <i>LcCCDlike-a</i> | 1172            | 246/20.99%                    | 267/22.78%           | 659/56.23%       |
| <i>LcCCDlike-b</i> | 359             | 37/10.31%                     | 97/27.02%            | 225/62.67%       |
| <i>LcCCD4</i>      | 589             | 104/17.66%                    | 116/19.69%           | 369/62.65%       |
| <i>LcCCD4a1</i>    | 584             | 75/12.84%                     | 157/26.88%           | 352/60.27%       |
| <i>LcCCD4a2</i>    | 584             | 77/13.18%                     | 164/28.08%           | 343/58.73%       |
| <i>LcCCD4b</i>     | 577             | 96/16.64%                     | 131/22.70%           | 350/60.66%       |
| <i>LcCCD4c1</i>    | 303             | 67/22.11%                     | 68/22.44%            | 168/55.45%       |
| <i>LcCCD4c2</i>    | 566             | 116/20.07%                    | 132/22.84%           | 330/57.09%       |
| <i>LcCCD7</i>      | 628             | 120/19.11%                    | 153/24.36%           | 355/56.53%       |
| <i>LcCCD8a</i>     | 548             | 118/21.53%                    | 119/21.72%           | 311/56.75%       |
| <i>LcCCD8b</i>     | 566             | 88/15.55%                     | 139/24.56%           | 339/59.89%       |
| <i>LcNCED1</i>     | 596             | 158/26.51%                    | 97/16.28%            | 341/57.21%       |
| <i>LcNCED2</i>     | 598             | 142/23.75%                    | 121/20.23%           | 335/56.02%       |
| <i>LcNCED3</i>     | 601             | 94/15.64%                     | 140/23.29%           | 367/61.06%       |



Supplement Table S4. GO enrichment analysis of *LcCCO* genes.

| Class                     | GO_Name            | GO_ID      | GO_Level | P_value  | Enrichment Score | Hits Genes Counts In Selected Set | Hits Genes Counts In Background | All Genes Counts In Selected Set | All Genes Counts In Background | Genes Of Selected Set In GO term                                                                                                                                                                                                                 | corrected p-value (BH method) |
|---------------------------|--------------------|------------|----------|----------|------------------|-----------------------------------|---------------------------------|----------------------------------|--------------------------------|--------------------------------------------------------------------------------------------------------------------------------------------------------------------------------------------------------------------------------------------------|-------------------------------|
| <b>Molecular function</b> | catalytic activity | GO:0003824 | 2        | 8.29E-04 | 1.604673073      | 15                                | 26535                           | 15                               | 42580                          | LITCHI012579.m1,LITCHI006417.m1,LITCHI015114.m1,LITCHI017175.m1,LITCHI015831.m1,LITCHI000409.m1,LITCHI000422.m1,LITCHI028785.m1,LITCHI017848.m1,LITCHI015832.m1,LITCHI000415.m1,LITCHI006516.m1,LITCHI001770.m1,LITCHI017183.m1,LITCHI004397.m1, | 0.004973991                   |
| <b>Cellular component</b> | thylakoid          | GO:0009579 | 4        | 0        | 19.02987619      | 13                                | 2073                            | 15                               | 45518                          | LITCHI012579.m1,LITCHI006417.m1,LITCHI015114.m1,LITCHI017175.m1,LITCHI015831.m1,LITCHI000409.m1,LITCHI000422.m1,LITCHI028785.m1,LITCHI017848.m1,LITCHI015832.m1,LITCHI000415.m1,LITCHI001770.m1,LITCHI004397.m1,                                 | 0                             |
| <b>Cellular component</b> | chloroplast        | GO:0009507 | 7        | 5.91E-10 | 4.121140788      | 15                                | 11045                           | 15                               | 45518                          | LITCHI012579.m1,LITCHI006417.m1,LITCHI015114.m1,LITCHI017175.m1,LITCHI015831.m1,LITCHI000409.m1,LITCHI000422.m1,LITCHI028785.m1,LITCHI017848.m1,LITCHI015832.m1,LITCHI000415.m1,LITCHI006516.m1,LITCHI001770.m1,LITCHI017183.m1,LITCHI004397.m1, | 3.84E-09                      |
| <b>Cellular component</b> | plastid            | GO:0009536 | 6        | 8.56E-10 | 4.020669552      | 15                                | 11321                           | 15                               | 45518                          | LITCHI012579.m1,LITCHI006417.m1,LITCHI015114.m1,LITCHI017175.m1,LITCHI015831.m1,LITCHI000409.m1,LITCHI000422.m1,LITCHI028785.m1,LITCHI017848.m1,LITCHI015832.m1,LITCHI000415.m1,LITCHI006516.m1,LITCHI001770.m1,LITCHI017183.m1,LITCHI004397.m1, | 3.71E-09                      |

| Class              | GO_Name         | GO_ID      | GO_Level | P_value  | Enrichment Score | Hits Genes Counts In Selected Set | Hits Genes Counts In Background | All Genes Counts In Selected Set | All Genes Counts In Background | Genes Of Selected Set In GO term                                                                                                                                                                                                                 | corrected p-value (BH method) |
|--------------------|-----------------|------------|----------|----------|------------------|-----------------------------------|---------------------------------|----------------------------------|--------------------------------|--------------------------------------------------------------------------------------------------------------------------------------------------------------------------------------------------------------------------------------------------|-------------------------------|
| Cellular component | Golgi apparatus | GO:0005794 | 6        | 1.81E-07 | 4.649438202      | 12                                | 7832                            | 15                               | 45518                          | LITCHI012579.m1,LITCHI015114.m1,LITCHI017175.m1,LITCHI015831.m1,LITCHI000409.m1,LITCHI000422.m1,LITCHI028785.m1,LITCHI017848.m1,LITCHI015832.m1,LITCHI000415.m1,LITCHI001770.m1,LITCHI004397.m1,                                                 | 5.89E-07                      |
| Cellular component | plasma membrane | GO:0005886 | 4        | 5.94E-07 | 2.600137096      | 15                                | 17506                           | 15                               | 45518                          | LITCHI012579.m1,LITCHI006417.m1,LITCHI015114.m1,LITCHI017175.m1,LITCHI015831.m1,LITCHI000409.m1,LITCHI000422.m1,LITCHI028785.m1,LITCHI017848.m1,LITCHI015832.m1,LITCHI000415.m1,LITCHI006516.m1,LITCHI001770.m1,LITCHI017183.m1,LITCHI004397.m1, | 1.54E-06                      |
| Cellular component | vacuole         | GO:0005773 | 6        | 8.51E-07 | 4.059576366      | 12                                | 8970                            | 15                               | 45518                          | LITCHI012579.m1,LITCHI015114.m1,LITCHI017175.m1,LITCHI015831.m1,LITCHI000409.m1,LITCHI000422.m1,LITCHI028785.m1,LITCHI017848.m1,LITCHI015832.m1,LITCHI000415.m1,LITCHI001770.m1,LITCHI004397.m1,                                                 | 1.84E-06                      |
| Cellular component | membrane        | GO:0016020 | 3        | 5.95E-04 | 1.64052476       | 15                                | 27746                           | 15                               | 45518                          | LITCHI012579.m1,LITCHI006417.m1,LITCHI015114.m1,LITCHI017175.m1,LITCHI015831.m1,LITCHI000409.m1,LITCHI000422.m1,LITCHI028785.m1,LITCHI017848.m1,LITCHI015832.m1,LITCHI000415.m1,LITCHI006516.m1,LITCHI001770.m1,LITCHI017183.m1,LITCHI004397.m1, | 0.001105253                   |
| Biological process | fruit ripening  | GO:0009835 | 5        | 0        | 63.98003565      | 12                                | 561                             | 15                               | 44866                          | LITCHI012579.m1,LITCHI015114.m1,LITCHI017175.m1,LITCHI015831.m1,LITCHI000409.m1,LITCHI000422.m1,LITCHI028785.m1,LITCHI017848.m1,LITCHI015832.m1,LITCHI000415.m1,LITCHI001770.m1,                                                                 | 0                             |

| Class              | GO_Name                 | GO_ID      | GO_Level | P_value  | Enrichment Score | Hits Genes Counts In Selected Set | Hits Genes Counts In Background | All Genes Counts In Selected Set | All Genes Counts In Background | Genes Of Selected Set In GO term                                                                                                                                                                                                                 | corrected p-value (BH method) |
|--------------------|-------------------------|------------|----------|----------|------------------|-----------------------------------|---------------------------------|----------------------------------|--------------------------------|--------------------------------------------------------------------------------------------------------------------------------------------------------------------------------------------------------------------------------------------------|-------------------------------|
| Biological process | pollination             | GO:0009856 | 3        | 3.87E-13 | 14.19810127      | 12                                | 2528                            | 15                               | 44866                          | 1,LITCHI004397.m1,<br>LITCHI012579.m1,LITCHI015114.m1,LITCHI017175.m1,LITCHI015831.m1,LITCHI000409.m1,LITCHI000422.m1,LITCHI028785.m1,LITCHI017848.m1,LITCHI015832.m1,LITCHI000415.m1,LITCHI001770.m1,LITCHI004397.m1,                           | 4.65E-12                      |
| Biological process | lipid metabolic process | GO:0006629 | 4        | 4.32E-13 | 6.666567608      | 15                                | 6730                            | 15                               | 44866                          | LITCHI012579.m1,LITCHI006417.m1,LITCHI015114.m1,LITCHI017175.m1,LITCHI015831.m1,LITCHI000409.m1,LITCHI000422.m1,LITCHI028785.m1,LITCHI017848.m1,LITCHI015832.m1,LITCHI000415.m1,LITCHI006516.m1,LITCHI001770.m1,LITCHI017183.m1,LITCHI004397.m1, | 3.45E-12                      |
| Biological process | flower development      | GO:0009908 | 7        | 1.88E-09 | 6.90378919       | 12                                | 5199                            | 15                               | 44866                          | LITCHI012579.m1,LITCHI015114.m1,LITCHI017175.m1,LITCHI015831.m1,LITCHI000409.m1,LITCHI000422.m1,LITCHI028785.m1,LITCHI017848.m1,LITCHI015832.m1,LITCHI000415.m1,LITCHI001770.m1,LITCHI004397.m1,                                                 | 1.13E-08                      |
| Biological process | catabolic process       | GO:0009056 | 3        | 3.21E-09 | 3.681765961      | 15                                | 12186                           | 15                               | 44866                          | LITCHI012579.m1,LITCHI006417.m1,LITCHI015114.m1,LITCHI017175.m1,LITCHI015831.m1,LITCHI000409.m1,LITCHI000422.m1,LITCHI028785.m1,LITCHI017848.m1,LITCHI015832.m1,LITCHI000415.m1,LITCHI006516.m1,LITCHI001770.m1,LITCHI017183.m1,LITCHI004397.m1, | 1.54E-08                      |
| Biological process | response to endogenous  | GO:0009719 | 3        | 3.04E-08 | 3.169622042      | 15                                | 14155                           | 15                               | 44866                          | LITCHI012579.m1,LITCHI006417.m1,LITCHI015114.m1,LITCHI017175.m1,LITCHI015831.m1,LITCHI000409.m1,LITCHI000422.m1,LITCHI028785.m1,LITCHI017848.m1,LITCHI015832.m1,LITCHI000415.m1,LITCHI006516.m1,LITCHI001770.m1,LITCHI017183.m1,LITCHI004397.m1, | 1.22E-07                      |



| Class              | GO_Name                            | GO_ID      | GO_Level | P_value  | Enrichment Score | Hits Genes Counts In Selected Set | Hits Genes Counts In Background | All Genes Counts In Selected Set | All Genes Counts In Background | Genes Of Selected Set In GO term                                                                                                                                                                                                                 | corrected p-value (BH method) |
|--------------------|------------------------------------|------------|----------|----------|------------------|-----------------------------------|---------------------------------|----------------------------------|--------------------------------|--------------------------------------------------------------------------------------------------------------------------------------------------------------------------------------------------------------------------------------------------|-------------------------------|
| Biological process | biosynthetic process               | GO:0009058 | 3        | 3.09E-05 | 1.998129509      | 15                                | 22454                           | 15                               | 44866                          | LITCHI012579.m1,LITCHI006417.m1,LITCHI015114.m1,LITCHI017175.m1,LITCHI015831.m1,LITCHI000409.m1,LITCHI000422.m1,LITCHI028785.m1,LITCHI017848.m1,LITCHI015832.m1,LITCHI000415.m1,LITCHI006516.m1,LITCHI001770.m1,LITCHI017183.m1,LITCHI004397.m1, | 6.74E-05                      |
| Biological process | response to chemical               | GO:0042221 | 3        | 3.76E-05 | 1.971958509      | 15                                | 22752                           | 15                               | 44866                          | LITCHI012579.m1,LITCHI006417.m1,LITCHI015114.m1,LITCHI017175.m1,LITCHI015831.m1,LITCHI000409.m1,LITCHI000422.m1,LITCHI028785.m1,LITCHI017848.m1,LITCHI015832.m1,LITCHI000415.m1,LITCHI006516.m1,LITCHI001770.m1,LITCHI017183.m1,LITCHI004397.m1, | 7.53E-05                      |
| Biological process | multicellular organism development | GO:0007275 | 4        | 5.96E-05 | 1.912365202      | 15                                | 23461                           | 15                               | 44866                          | LITCHI012579.m1,LITCHI006417.m1,LITCHI015114.m1,LITCHI017175.m1,LITCHI015831.m1,LITCHI000409.m1,LITCHI000422.m1,LITCHI028785.m1,LITCHI017848.m1,LITCHI015832.m1,LITCHI000415.m1,LITCHI006516.m1,LITCHI001770.m1,LITCHI017183.m1,LITCHI004397.m1, | 1.10E-04                      |
| Biological process | post-embryonic development         | GO:0009791 | 3        | 1.10E-04 | 2.621060318      | 12                                | 13694                           | 15                               | 44866                          | LITCHI012579.m1,LITCHI015114.m1,LITCHI017175.m1,LITCHI015831.m1,LITCHI000409.m1,LITCHI000422.m1,LITCHI028785.m1,LITCHI017848.m1,LITCHI015832.m1,LITCHI000415.m1,LITCHI001770.m1,LITCHI004397.m1,                                                 | 1.89E-04                      |
| Biological process | anatomical structure               | GO:0048856 | 3        | 2.31E-04 | 1.747186417      | 15                                | 25679                           | 15                               | 44866                          | LITCHI012579.m1,LITCHI006417.m1,LITCHI015114.m1,LITCHI017175.m1,LITCHI015831.m1,LITCHI000409.m1,LITCHI000422.m1,LITCHI028785.m1,LITCHI017848.m1,LITCHI015832.m1,LITCHI000415.m1,LITCHI001770.m1,LITCHI004397.m1,                                 | 3.70E-04                      |

| Class              | GO_Name            | GO_ID      | GO_Level | P_value     | Enrichment Score | Hits Genes Counts In Selected Set | Hits Genes Counts In Background | All Genes Counts In Selected Set | All Genes Counts In Background | Genes Of Selected Set In GO term                                                                                                                                                                                                                                                                                                                                                                                                                                                                                             | corrected p-value (BH method) |
|--------------------|--------------------|------------|----------|-------------|------------------|-----------------------------------|---------------------------------|----------------------------------|--------------------------------|------------------------------------------------------------------------------------------------------------------------------------------------------------------------------------------------------------------------------------------------------------------------------------------------------------------------------------------------------------------------------------------------------------------------------------------------------------------------------------------------------------------------------|-------------------------------|
|                    | development        |            |          |             |                  |                                   |                                 |                                  |                                | HI028785.m1,LITCHI017848.m1,LITCHI015832.m1,LITCHI000415.m1,LITCHI006516.m1,LITCHI001770.m1,LITCHI017183.m1,LITCHI004397.m1,LITCHI012579.m1,LITCHI015114.m1,LITCHI017175.m1,LITCHI015831.m1,LITCHI000409.m1,LITCHI000422.m1,LITCHI028785.m1,LITCHI017848.m1,LITCHI015832.m1,LITCHI000415.m1,LITCHI001770.m1,LITCHI004397.m1,LITCHI012579.m1,LITCHI015114.m1,LITCHI017175.m1,LITCHI015831.m1,LITCHI000409.m1,LITCHI000422.m1,LITCHI028785.m1,LITCHI017848.m1,LITCHI015832.m1,LITCHI000415.m1,LITCHI001770.m1,LITCHI004397.m1, |                               |
| Biological process | reproduction       | GO:0000003 | 2        | 9.12E-04    | 2.149526889      | 12                                | 16698                           | 15                               | 44866                          | HI028785.m1,LITCHI017848.m1,LITCHI015832.m1,LITCHI000415.m1,LITCHI006516.m1,LITCHI001770.m1,LITCHI017183.m1,LITCHI004397.m1,LITCHI012579.m1,LITCHI015114.m1,LITCHI017175.m1,LITCHI015831.m1,LITCHI000409.m1,LITCHI000422.m1,LITCHI028785.m1,LITCHI017848.m1,LITCHI015832.m1,LITCHI000415.m1,LITCHI001770.m1,LITCHI004397.m1,                                                                                                                                                                                                 | 0.001367911                   |
| Biological process | response to stress | GO:0006950 | 3        | 0.037819746 | 1.473069031      | 12                                | 24366                           | 15                               | 44866                          | HI028785.m1,LITCHI017848.m1,LITCHI015832.m1,LITCHI000415.m1,LITCHI006516.m1,LITCHI001770.m1,LITCHI017183.m1,LITCHI004397.m1,LITCHI012579.m1,LITCHI015114.m1,LITCHI017175.m1,LITCHI015831.m1,LITCHI000409.m1,LITCHI000422.m1,LITCHI028785.m1,LITCHI017848.m1,LITCHI015832.m1,LITCHI000415.m1,LITCHI001770.m1,LITCHI004397.m1,                                                                                                                                                                                                 | 0.050426328                   |

Supplement Table S5. The TPM value and differential expression analysis of *LcCCO* genes during pericarp coloring of 'Feizixiao' litchi treated by exogenous

CPPU.

| Gene name          | TPM value |       |       |        |        |       |       |       |       |       |       |       | log2(FoldChange) |           |           |          | P Value      |             |              |          |
|--------------------|-----------|-------|-------|--------|--------|-------|-------|-------|-------|-------|-------|-------|------------------|-----------|-----------|----------|--------------|-------------|--------------|----------|
|                    | CK1_1     | CK1_2 | CK1_3 | CK2_1  | CK2_2  | CK2_3 | T1_1  | T1_2  | T1_3  | T2_1  | T2_2  | T2_3  | CK1-vs-CK2       | CK1-vs-T1 | CK2-vs-T2 | T1-vs-T2 | CK1-vs-s-CK2 | CK1-vs-s-T1 | CK2-vs-vs-T2 | T1-vs-T2 |
| <i>LcCCD1</i>      | 59.30     | 69.41 | 65.84 | 47.25  | 35.91  | 47.59 | 58.22 | 65.55 | 65.55 | 45.69 | 44.50 | 52.30 | -0.92            | -0.08     | 0.17      | -0.67    | 0.18         | 0.91        | 0.80         | 0.29     |
| <i>LcCCDlike-a</i> | 0.44      | 0.21  | 0.26  | 0.15   | 0.15   | 0.48  | 0.13  | 0.07  | 0.08  | 0.41  | 0.09  | 0.35  | 0.05             | -0.48     | 0.44      | 0.97     | 1.00         | 0.75        | 0.73         | 0.42     |
| <i>LcCCDlike-b</i> | 0.00      | 0.19  | 0.00  | 5.30   | 2.90   | 6.05  | 0.00  | 0.05  | 0.00  | 0.30  | 0.47  | 1.93  | -0.19            | -0.07     | -2.35     | -2.46    | 0.87         | 0.96        | 0.05         | 0.04     |
| <i>LcCCD4</i>      | 36.19     | 88.04 | 52.46 | 134.03 | 111.64 | 83.05 | 50.16 | 95.99 | 43.11 | 54.00 | 50.52 | 76.84 | 0.50             | 0.05      | -0.86     | -0.41    | 0.48         | 0.95        | 0.21         | 0.55     |
| <i>LcCCD4a1</i>    | 0.04      | 0.00  | 0.00  | 0.00   | 0.00   | 0.00  | 0.00  | 0.00  | 0.00  | 0.00  | 0.00  | 0.08  | -0.26            | -0.26     | 0.49      | 0.49     | 1.00         | 1.00        | 1.00         | 1.00     |
| <i>LcCCD4a2</i>    | 0.00      | 0.02  | 0.00  | 0.00   | 0.00   | 0.00  | 0.00  | 0.02  | 0.00  | 0.00  | 0.00  | 0.00  | -0.26            | -0.26     | 0.14      | 0.14     | 1.00         | 1.00        | 1.00         | 1.00     |
| <i>LcCCD4b</i>     | 0.00      | 0.00  | 0.00  | 0.00   | 0.00   | 0.00  | 0.00  | 0.03  | 0.00  | 0.00  | 0.00  | 0.00  | -0.26            | -0.26     | 0.14      | 0.14     | 1.00         | 1.00        | 1.00         | 1.00     |
| <i>LcCCD4c1</i>    | 0.23      | 0.29  | 0.10  | 0.00   | 0.06   | 0.06  | 0.04  | 0.05  | 0.00  | 0.07  | 0.00  | 0.00  | -1.77            | -1.77     | 0.14      | 0.14     | 0.27         | 0.28        | 1.00         | 1.00     |
| <i>LcCCD4c2</i>    | 0.12      | 0.07  | 0.02  | 0.00   | 0.00   | 0.00  | 0.17  | 0.00  | 0.02  | 0.00  | 0.00  | 0.00  | -2.22            | -0.16     | 0.14      | -1.92    | 0.10         | 1.00        | 1.00         | 0.18     |
| <i>LcCCD7</i>      | 0.00      | 0.00  | 0.00  | 0.00   | 0.00   | 0.00  | 0.00  | 0.00  | 0.00  | 0.00  | 0.00  | 0.00  | -0.26            | -0.26     | 0.14      | 0.14     | 1.00         | 1.00        | 1.00         | 1.00     |
| <i>LcCCD8a</i>     | 0.15      | 1.62  | 0.35  | 0.70   | 0.25   | 0.37  | 0.14  | 0.25  | 0.23  | 0.69  | 0.69  | 0.83  | -4.97            | -4.97     | 0.14      | 0.14     | 0.01         | 0.01        | 1.00         | 1.00     |
| <i>LcCCD8b</i>     | 0.00      | 0.00  | 0.00  | 0.00   | 0.00   | 0.00  | 0.00  | 0.00  | 0.00  | 0.00  | 0.00  | 0.00  | -0.26            | 0.22      | 0.14      | -0.35    | 1.00         | 1.00        | 1.00         | 1.00     |
| <i>LcNCED1</i>     | 6.54      | 5.84  | 1.10  | 0.77   | 0.58   | 1.13  | 4.39  | 1.14  | 1.77  | 1.48  | 1.04  | 0.54  | -2.91            | -0.90     | 0.41      | -1.59    | 0.02         | 0.42        | 0.71         | 0.16     |
| <i>LcNCED2</i>     | 20.87     | 17.48 | 21.14 | 3.17   | 3.08   | 3.28  | 32.55 | 18.06 | 17.94 | 4.22  | 4.69  | 3.38  | -3.01            | 0.15      | 0.35      | -2.81    | 0.00         | 0.85        | 0.74         | 0.00     |
| <i>LcNCED3</i>     | 0.02      | 0.03  | 0.00  | 0.02   | 0.00   | 0.07  | 0.00  | 0.00  | 0.00  | 0.00  | 0.00  | 0.02  | 0.09             | -0.63     | -0.58     | 0.14     | 1.00         | 1.00        | 0.76         | 1.00     |

**Supplement Table S6. The TPM value and differential expression analysis of *LcCCO* genes of**

**'Feizixiao' litchi on the 0, 1, 3, and 7 days after bags removed (Zhang et al., 2016a).**

| Gene name          | TPM value |       |        |        | log2 (FoldChange) |                |                | P Value        |                |                |
|--------------------|-----------|-------|--------|--------|-------------------|----------------|----------------|----------------|----------------|----------------|
|                    | 0 d       | 1 d   | 3 d    | 7 d    | 0 d-vs-<br>1 d    | 0 d-vs-<br>3 d | 0 d-vs-<br>7 d | 0 d-vs-<br>1 d | 0 d-vs-<br>3 d | 0 d-vs-<br>7 d |
| <i>LcCCD1</i>      | 10.80     | 14.12 | 11.80  | 14.07  | 0.42              | 0.08           | 0.45           | 0.00           | 0.35           | 0.00           |
| <i>LcCCDlike-a</i> | 0.00      | 0.00  | 0.06   | 0.04   | -0.09             | 1.73           | 1.09           | 1.00           | 0.63           | 0.63           |
| <i>LcCCDlike-b</i> | 0.31      | 0.28  | 0.29   | 0.00   | -0.16             | -0.11          | -2.58          | 1.00           | 1.00           | 0.22           |
| <i>LcCCD4</i>      | 111.85    | 95.18 | 122.06 | 153.59 | -0.20             | 0.09           | 0.51           | 0.00           | 0.04           | 0.00           |
| <i>LcCCD4a1</i>    | 0.00      | 0.00  | 0.00   | 0.00   | -0.09             | 0.32           | -0.54          | 1.00           | 1.00           | 1.00           |
| <i>LcCCD4a2</i>    | 0.04      | 0.00  | 0.00   | 0.00   | -0.09             | 0.32           | -0.54          | 1.00           | 1.00           | 1.00           |
| <i>LcCCD4b</i>     | 0.00      | 0.00  | 0.00   | 0.00   | -0.09             | 0.32           | -0.54          | 1.00           | 1.00           | 1.00           |
| <i>LcCCD4c1</i>    | 0.00      | 0.00  | 0.00   | 0.00   | -0.09             | 0.32           | -0.54          | 1.00           | 1.00           | 1.00           |
| <i>LcCCD4c2</i>    | 0.00      | 0.00  | 0.00   | 0.00   | -0.09             | 0.32           | -0.54          | 1.00           | 1.00           | 1.00           |
| <i>LcCCD7</i>      | 0.00      | 0.00  | 0.00   | 0.00   | -0.09             | 0.32           | -0.54          | 1.00           | 1.00           | 1.00           |
| <i>LcCCD8a</i>     | 0.00      | 0.00  | 0.00   | 0.00   | -0.09             | 0.32           | -0.54          | 1.00           | 1.00           | 1.00           |
| <i>LcCCD8b</i>     | 0.00      | 0.00  | 0.00   | 0.00   | -0.09             | 0.32           | -0.54          | 1.00           | 1.00           | 1.00           |
| <i>LcNCED1</i>     | 24.73     | 15.27 | 49.47  | 114.86 | -0.67             | 0.96           | 2.27           | 0.00           | 0.00           | 0.00           |
| <i>LcNCED2</i>     | 18.71     | 12.18 | 34.77  | 33.81  | -0.58             | 0.85           | 0.91           | 0.00           | 0.00           | 0.00           |
| <i>LcNCED3</i>     | 0.04      | 0.10  | 0.20   | 0.08   | 1.46              | 2.34           | 1.09           | 0.63           | 0.38           | 0.63           |

**Supplement Table S7. The TPM value and differential expression analysis of *LcCCO* genes in**

**'Nuomici' Litchi during three different development stages of fruit (Lai et al., 2015).**

| Gene name          | TPM value |        |        | log2 (FoldChange) |              | P Value         |              |
|--------------------|-----------|--------|--------|-------------------|--------------|-----------------|--------------|
|                    | Green     | Yellow | Red    | Green-vs-Yellow   | Green-vs-Red | Green-vs-Yellow | Green-vs-Red |
| <i>LcCCD1</i>      | 100.27    | 53.77  | 63.34  | -0.74             | -0.51        | 0.00            | 0.00         |
| <i>LcCCDlike-a</i> | 0.22      | 0.00   | 0.09   | -0.71             | -1.15        | 1.00            | 1.00         |
| <i>LcCCDlike-b</i> | 0.00      | 0.00   | 0.00   | 0.29              | -0.15        | 1.00            | 1.00         |
| <i>LcCCD4</i>      | 210.19    | 177.69 | 142.03 | -0.07             | -0.41        | 0.36            | 0.00         |
| <i>LcCCD4a1</i>    | 0.00      | 0.48   | 0.45   | 1.18              | 1.09         | 1.00            | 1.00         |
| <i>LcCCD4a2</i>    | 0.00      | 0.04   | 2.22   | -2.55             | 3.40         | 1.00            | 0.01         |
| <i>LcCCD4b</i>     | 0.23      | 0.00   | 0.00   | 0.29              | -0.15        | 1.00            | 1.00         |
| <i>LcCCD4c1</i>    | 0.00      | 0.00   | 0.00   | 0.29              | -0.15        | 1.00            | 1.00         |
| <i>LcCCD4c2</i>    | 0.00      | 0.00   | 0.00   | 0.29              | -0.15        | 1.00            | 1.00         |
| <i>LcCCD7</i>      | 0.00      | 0.00   | 0.00   | 0.29              | -0.15        | 1.00            | 1.00         |
| <i>LcCCD8a</i>     | 0.00      | 0.00   | 0.00   | 0.29              | -0.15        | 1.00            | 1.00         |
| <i>LcCCD8b</i>     | 0.00      | 0.00   | 0.00   | 0.29              | -0.15        | 1.00            | 1.00         |
| <i>LcNCED1</i>     | 98.25     | 121.87 | 173.04 | 0.47              | 0.97         | 0.00            | 0.00         |



|                |       |       |        |       |       |      |      |
|----------------|-------|-------|--------|-------|-------|------|------|
| <i>LcNCED2</i> | 78.60 | 51.46 | 121.90 | -0.45 | 0.79  | 0.00 | 0.00 |
| <i>LcNCED3</i> | 0.00  | 0.00  | 0.18   | 0.29  | -0.15 | 1.00 | 1.00 |

Supplement Table S8. The TPM value and differential expression analysis of *LcCCO* genes of the entire inflorescences samples of 'Feizixiao' litchi on 28 days after the uniconazole treatment (Wei et al., 2017b).

| Gene name          | TPM value |       | log <sub>2</sub> (FoldChange) | P Value |
|--------------------|-----------|-------|-------------------------------|---------|
|                    | CK        | T     | T-vs-CK                       | CK-vs-T |
| <i>LcCCD1</i>      | 13.55     | 13.56 | 0.05                          | 0.45    |
| <i>LcCCDlike-a</i> | 0.11      | 0.09  | -0.17                         | 1.00    |
| <i>LcCCDlike-b</i> | 0.67      | 1.09  | 0.75                          | 0.27    |
| <i>LcCCD4</i>      | 71.40     | 41.61 | -0.74                         | 0.00    |
| <i>LcCCD4a1</i>    | 0.07      | 0.00  | -0.94                         | 1.00    |
| <i>LcCCD4a2</i>    | 0.07      | 0.03  | -0.94                         | 1.00    |
| <i>LcCCD4b</i>     | 0.00      | 0.00  | 0.00                          | 1.00    |
| <i>LcCCD4c1</i>    | 0.31      | 0.00  | -1.97                         | 0.38    |
| <i>LcCCD4c2</i>    | 61.86     | 3.87  | -3.94                         | 0.00    |
| <i>LcCCD7</i>      | 0.00      | 0.00  | 0.00                          | 1.00    |
| <i>LcCCD8a</i>     | 6.54      | 4.27  | -0.59                         | 0.00    |
| <i>LcCCD8b</i>     | 0.87      | 0.28  | -1.60                         | 0.00    |
| <i>LcNCED1</i>     | 19.24     | 17.54 | -0.08                         | 0.37    |
| <i>LcNCED2</i>     | 89.87     | 32.09 | -1.44                         | 0.00    |
| <i>LcNCED3</i>     | 166.32    | 52.37 | -1.61                         | 0.00    |

Supplement Table S9. The TPM value and differential expression analysis of *LcCCO* genes of fruit samples of 'Wuye' litchi after 2, 4, and 7 days treated by girdling plus defoliation(Li et al., 2015a).

| Gene name          | TPM value |        |       |       |       |        | log2(FoldChange) |            |            | P Value    |            |            |
|--------------------|-----------|--------|-------|-------|-------|--------|------------------|------------|------------|------------|------------|------------|
|                    | CK2       | CK4    | CK7   | GPD2  | GPD4  | GPD7   | CK2-vs-GPD       | CK4-vs-GPD | CK7-vs-GPD | CK2-vs-GPD | CK4-vs-GPD | CK7-vs-GPD |
|                    |           |        |       |       |       |        | 2                | 4          | 7          | 2          | 4          | 7          |
| <i>LcCCD1</i>      | 58.99     | 57.46  | 54.59 | 30.08 | 40.22 | 55.79  | -0.93            | -0.36      | 0.12       | 0.00       | 0.00       | 0.23       |
| <i>LcCCDlike-a</i> | 0.00      | 0.00   | 0.00  | 0.00  | 0.00  | 0.00   | 0.00             | 0.00       | 0.00       | 1.00       | 1.00       | 1.00       |
| <i>LcCCDlike-b</i> | 0.00      | 1.36   | 0.00  | 0.00  | 1.35  | 0.64   | 0.00             | 0.15       | 9.43       | 1.00       | 1.00       | 1.00       |
| <i>LcCCD4</i>      | 68.51     | 113.00 | 87.66 | 82.77 | 98.20 | 144.83 | 0.32             | -0.04      | 0.82       | 0.01       | 0.75       | 0.00       |
| <i>LcCCD4a1</i>    | 0.00      | 0.00   | 0.74  | 0.18  | 0.00  | 0.00   | 8.37             | 0.00       | -10.37     | 1.00       | 1.00       | 0.50       |
| <i>LcCCD4a2</i>    | 1.14      | 1.53   | 2.22  | 0.10  | 3.86  | 0.91   | -3.42            | 1.48       | -1.20      | 0.22       | 0.08       | 0.34       |
| <i>LcCCD4b</i>     | 0.38      | 0.00   | 0.59  | 0.00  | 1.09  | 0.90   | -9.41            | 11.08      | 0.70       | 0.50       | 0.25       | 1.00       |
| <i>LcCCD4c1</i>    | 0.00      | 0.54   | 0.58  | 0.00  | 0.81  | 0.77   | 0.00             | 0.74       | 0.49       | 1.00       | 1.00       | 1.00       |
| <i>LcCCD4c2</i>    | 0.22      | 0.00   | 0.00  | 0.00  | 0.00  | 0.73   | -8.61            | 0.00       | 10.43      | 1.00       | 1.00       | 0.50       |
| <i>LcCCD7</i>      | 0.00      | 0.29   | 0.00  | 0.00  | 0.00  | 0.00   | 0.00             | 0.00       | 0.00       | 1.00       | 1.00       | 1.00       |
| <i>LcCCD8a</i>     | 21.86     | 14.92  | 10.00 | 0.00  | 34.39 | 0.00   | -15.28           | 1.36       | -14.18     | 0.00       | 0.00       | 0.00       |
| <i>LcCCD8b</i>     | 0.20      | 1.83   | 0.25  | 0.25  | 2.74  | 0.00   | 0.42             | 0.74       | -8.94      | 1.00       | 0.45       | 1.00       |
| <i>LcNCED1</i>     | 40.95     | 11.12  | 34.42 | 15.28 | 13.76 | 9.78   | -1.38            | 0.46       | -1.73      | 0.00       | 0.19       | 0.00       |
| <i>LcNCED2</i>     | 27.74     | 88.35  | 33.42 | 66.88 | 78.49 | 33.39  | 1.34             | 0.00       | 0.08       | 0.00       | 1.00       | 0.66       |
| <i>LcNCED3</i>     | 1.85      | 4.49   | 9.06  | 2.90  | 5.27  | 4.35   | 0.71             | 0.39       | -0.97      | 0.38       | 0.61       | 0.04       |

Supplement Table S10. The TPM value and differential expression analysis of *LcCCO* genes of abscission zone samples of 'Feizixiao'litchi after 0, 1, 2, and 3 days treated by exogenous ethephon (Li et al., 2015b).

| Gene name          | TPM value |        |        |        |        |        |        | log <sub>2</sub> (FoldChange) |                |                |                 |                 |                 |                | P Value        |                |                 |                 |                |
|--------------------|-----------|--------|--------|--------|--------|--------|--------|-------------------------------|----------------|----------------|-----------------|-----------------|-----------------|----------------|----------------|----------------|-----------------|-----------------|----------------|
|                    | CK0       | CK1    | CK2    | CK3    | ETH1   | ETH2   | ETH3   | CK0-<br>vs-C<br>K1            | CK0-v<br>s-CK2 | CK0-v<br>s-CK3 | CK0-vs<br>-ETH1 | CK0-vs<br>-ETH2 | CK0-vs<br>-ETH3 | CK0-v<br>s-CK1 | CK0-vs<br>-CK2 | CK0-vs<br>-CK3 | CK0-vs<br>-ETH1 | CK0-vs<br>-ETH2 | CK0-vs<br>ETH3 |
| <i>LcCCD1</i>      | 91.57     | 89.52  | 88.08  | 76.00  | 21.01  | 35.43  | 65.06  | 0.02                          | -0.05          | -0.19          | -2.12           | -1.34           | -0.38           | 0.68           | 0.31           | 0.00           | 0.00            | 0.00            | 0.00           |
| <i>LcCCDlike-a</i> | 0.25      | 0.00   | 0.29   | 0.47   | 0.44   | 0.47   | 0.00   | -2.34                         | 0.19           | 0.97           | 0.80            | 0.92            | -2.34           | 0.22           | 1.00           | 0.42           | 0.42            | 0.42            | 0.22           |
| <i>LcCCDlike-b</i> | 0.00      | 0.91   | 0.82   | 0.57   | 0.36   | 0.38   | 0.70   | 2.36                          | 2.16           | 1.69           | 0.96            | 1.08            | 2.04            | 0.22           | 0.38           | 0.63           | 1.00            | 1.00            | 0.38           |
| <i>LcCCD4</i>      | 17.86     | 35.47  | 33.35  | 18.69  | 6.99   | 8.37   | 103.29 | 1.05                          | 0.95           | 0.14           | -1.33           | -1.02           | 2.64            | 0.00           | 0.00           | 0.33           | 0.00            | 0.00            | 0.00           |
| <i>LcCCD4a1</i>    | 0.15      | 0.00   | 0.18   | 0.19   | 0.12   | 0.20   | 0.14   | -0.50                         | 0.32           | 0.46           | -0.19           | 0.50            | 0.12            | 1.00           | 1.00           | 1.00           | 1.00            | 1.00            | 1.00           |
| <i>LcCCD4a2</i>    | 3.99      | 3.86   | 2.15   | 3.40   | 0.37   | 0.32   | 0.57   | 0.00                          | -0.88          | -0.16          | -3.43           | -3.58           | -2.71           | 1.00           | 0.03           | 0.72           | 0.00            | 0.00            | 0.00           |
| <i>LcCCD4b</i>     | 0.98      | 1.66   | 1.16   | 1.14   | 0.60   | 0.72   | 0.35   | 0.81                          | 0.25           | 0.28           | -0.72           | -0.41           | -1.37           | 0.25           | 0.82           | 0.82           | 0.45            | 0.80            | 0.18           |
| <i>LcCCD4c1</i>    | 0.22      | 0.65   | 0.00   | 0.00   | 0.00   | 0.45   | 0.00   | 1.61                          | 0.16           | 0.08           | 0.00            | 1.08            | 0.00            | 0.63           | 1.00           | 1.00           | 1.00            | 1.00            | 1.00           |
| <i>LcCCD4c2</i>    | 0.10      | 0.72   | 0.34   | 0.75   | 0.41   | 0.11   | 0.30   | 2.84                          | 1.75           | 2.92           | 1.98            | 0.08            | 1.61            | 0.07           | 0.63           | 0.07           | 0.38            | 1.00            | 0.63           |
| <i>LcCCD7</i>      | 0.00      | 0.00   | 0.00   | 0.00   | 0.00   | 0.00   | 0.00   | 0.00                          | 0.16           | 0.08           | 0.00            | 0.08            | 0.00            | 1.00           | 1.00           | 1.00           | 1.00            | 1.00            | 1.00           |
| <i>LcCCD8a</i>     | 76.21     | 86.43  | 72.64  | 66.91  | 0.00   | 12.40  | 22.41  | 0.24                          | -0.03          | -0.11          | -9.63           | -2.56           | -1.66           | 0.00           | 0.71           | 0.17           | 0.00            | 0.00            | 0.00           |
| <i>LcCCD8b</i>     | 2.34      | 2.19   | 2.61   | 1.65   | 0.09   | 0.36   | 0.51   | -0.04                         | 0.20           | -0.42          | -4.71           | -2.65           | -2.09           | 1.00           | 0.78           | 0.45           | 0.00            | 0.00            | 0.00           |
| <i>LcNCED1</i>     | 93.07     | 32.92  | 49.74  | 40.32  | 12.10  | 14.22  | 46.64  | -1.44                         | -0.88          | -1.13          | -2.94           | -2.67           | -0.89           | 0.00           | 0.00           | 0.00           | 0.00            | 0.00            | 0.00           |
| <i>LcNCED2</i>     | 238.83    | 238.95 | 244.37 | 251.53 | 483.58 | 339.90 | 399.29 | 0.07                          | 0.08           | 0.17           | 1.05            | 0.59            | 0.86            | 0.11           | 0.05           | 0.00           | 0.00            | 0.00            | 0.00           |
| <i>LcNCED3</i>     | 0.90      | 0.61   | 0.58   | 0.83   | 0.09   | 0.45   | 0.34   | -0.49                         | -0.58          | -0.04          | -3.33           | -0.94           | -1.29           | 0.63           | 0.45           | 1.00           | 0.01            | 0.30            | 0.18           |

**Supplement Table S11. The TPM value and differential expression analysis of *LcCCO* genes of the peel samples on 0d and 4d after stored at room temperature and 0h, 24h, and 48h stored at room temperature after precooling for 14 days (Yun et al., 2016).**

| Gene name          | TPM value |       |        |           |           |           | log <sub>2</sub> (FoldChange) |         |         |        |        |         | P Value |        |        |         |         |        |
|--------------------|-----------|-------|--------|-----------|-----------|-----------|-------------------------------|---------|---------|--------|--------|---------|---------|--------|--------|---------|---------|--------|
|                    | 0 d       | 4 d   | 14 d-0 | 14 d-24 h | 14 d-48 h | 0 d-vs-4d | 0 d-vs-14                     | 0       | 0       | 14 d-0 | 14 d-0 | 0       | 0       | 0      | 0      | 14 d-0  | 14 d-0  |        |
|                    |           |       | h      |           |           |           | d-0 h                         | d-vs-14 | d-vs-14 | d-24 h | d-48 h | d-vs-14 | d-vs-14 | d-24 h | d-48 h | d-vs-14 | d-vs-14 | d-24 h |
| <i>LcCCD1</i>      | 17.67     | 10.17 | 9.55   | 20.83     | 12.01     | -0.56     | -0.80                         | 0.17    | -0.50   | 0.96   | 0.30   | 0.00    | 0.00    | 0.00   | 0.00   | 0.00    | 0.00    |        |
| <i>LcCCDlike-a</i> | 0.21      | 0.22  | 2.23   | 0.29      | 0.29      | 0.30      | 3.50                          | 0.41    | 0.52    | -3.10  | -2.99  | 0.58    | 0.00    | 0.51   | 0.34   | 0.00    | 0.00    |        |
| <i>LcCCDlike-b</i> | 0.37      | 0.12  | 0.16   | 0.16      | 0         | -1.45     | -1.19                         | -1.27   | -3.04   | -0.08  | -1.85  | 0.34    | 0.34    | 0.23   | 0.04   | 1.00    | 0.63    |        |
| <i>LcCCD4</i>      | 21.22     | 7.06  | 7.29   | 17.61     | 14.35     | -1.27     | -1.42                         | -0.31   | -0.41   | 1.11   | 1.01   | 0.00    | 0.00    | 0.00   | 0.00   | 0.00    | 0.00    |        |
| <i>LcCCD4a1</i>    | 0.05      | 0     | 10.88  | 0.17      | 0.11      | -0.32     | 7.83                          | 1.63    | 1.14    | -6.20  | -6.69  | 1.00    | 0.00    | 0.29   | 0.69   | 0.00    | 0.00    |        |
| <i>LcCCD4a2</i>    | 0.03      | 0     | 4.73   | 0.08      | 0         | 0.68      | 7.63                          | 1.68    | 0.00    | -5.95  | -7.63  | 1.00    | 0.00    | 0.63   | 1.00   | 0.00    | 0.00    |        |
| <i>LcCCD4b</i>     | 0         | 0     | 0.83   | 0         | 0         | 0.68      | 5.11                          | 0.26    | 0.00    | -4.85  | -5.11  | 1.00    | 0.00    | 1.00   | 1.00   | 0.00    | 0.00    |        |
| <i>LcCCD4c1</i>    | 0         | 0     | 0      | 0         | 0         | 0.68      | 0.26                          | 0.26    | 0.00    | 0.00   | -0.26  | 1.00    | 1.00    | 1.00   | 1.00   | 1.00    | 1.00    |        |
| <i>LcCCD4c2</i>    | 0         | 0     | 0      | 0         | 0         | 0.68      | 0.26                          | 0.26    | 0.00    | 0.00   | -0.26  | 1.00    | 1.00    | 1.00   | 1.00   | 1.00    | 1.00    |        |
| <i>LcCCD7</i>      | 0         | 0.06  | 0      | 0         | 0         | 1.58      | 0.26                          | 0.26    | 0.00    | 0.00   | -0.26  | 1.00    | 1.00    | 1.00   | 1.00   | 1.00    | 1.00    |        |
| <i>LcCCD8a</i>     | 0         | 0.05  | 0.04   | 0         | 0         | 1.14      | 0.85                          | 0.26    | 0.00    | -0.58  | -0.85  | 1.00    | 1.00    | 1.00   | 1.00   | 1.00    | 1.00    |        |
| <i>LcCCD8b</i>     | 0.03      | 0.03  | 0.11   | 0.03      | 0.02      | 0.68      | 2.26                          | 0.26    | 0.00    | -2.00  | -2.26  | 1.00    | 0.38    | 1.00   | 1.00   | 0.38    | 0.38    |        |
| <i>LcNCED1</i>     | 94.26     | 40.49 | 17.07  | 128.54    | 61.02     | -0.97     | -2.37                         | 0.38    | -0.55   | 2.75   | 1.82   | 0.00    | 0.00    | 0.00   | 0.00   | 0.00    | 0.00    |        |
| <i>LcNCED2</i>     | 51.34     | 10.42 | 6.91   | 21.48     | 30.1      | -2.03     | -2.78                         | -1.32   | -0.66   | 1.46   | 2.12   | 0.00    | 0.00    | 0.00   | 0.00   | 0.00    | 0.00    |        |
| <i>LcNCED3</i>     | 0.03      | 0.06  | 0.08   | 0         | 0.05      | 1.58      | 1.85                          | 0.26    | 1.14    | -1.58  | -0.71  | 1.00    | 0.63    | 1.00   | 1.00   | 0.63    | 1.00    |        |
